# Supplementary material for: Is ambient air pollution associated with onset of sudden infant death syndrome: a case-crossover study in the UK
Source: PubMed Central journal article supplement (PMC5898297; doi:10.1136/bmjopen-2017-018341), 2018-04-12
Supplement: bmjopen-2017-018341.draft_revisions.pdf [file bmjopen-2017-018341.draft_revisions.pdf]

# BMJ Open

BMJ Open is committed to open peer review. As part of this commitment we make the peer review history of every article we publish publicly available.

When an article is published we post the peer reviewers' comments and the authors' responses online. We also post the versions of the paper that were used during peer review. These are the versions that the peer review comments apply to.

The versions of the paper that follow are the versions that were submitted during the peer review process. They are not the versions of record or the final published versions. They should not be cited or distributed as the published version of this manuscript.

BMJ Open is an open access journal and the full, final, typeset and author-corrected version of record of the manuscript is available on our site with no access controls, subscription charges or pay-per-view fees (<http://bmjopen.bmj.com>).

If you have any questions on BMJ Open's open peer review process please email [info.bmjopen@bmj.com](mailto:info.bmjopen@bmj.com)

# BMJ Open

## Ambient Air Pollution and Sudden Infant Death Syndrome: A case crossover study

|                                 |                                                                                                                                                                                                                                                                                                                                                     |
|---------------------------------|-----------------------------------------------------------------------------------------------------------------------------------------------------------------------------------------------------------------------------------------------------------------------------------------------------------------------------------------------------|
| Journal:                        | <i>BMJ Open</i>                                                                                                                                                                                                                                                                                                                                     |
| Manuscript ID                   | bmjopen-2017-018341                                                                                                                                                                                                                                                                                                                                 |
| Article Type:                   | Research                                                                                                                                                                                                                                                                                                                                            |
| Date Submitted by the Author:   | 21-Jun-2017                                                                                                                                                                                                                                                                                                                                         |
| Complete List of Authors:       | Litchfield, Ian; University of Birmingham, Institute of Applied Health Research<br>Ayres, Jon; University of Birmingham, Institute of Applied Health Research<br>Jaakkola, Jouni; University of Oulu, Center for Environmental and Respiratory Health Research<br>Mohammed, Nuredin; University of Birmingham, Institute of Applied Health Research |
| <b>Primary Subject Heading</b>: | Epidemiology                                                                                                                                                                                                                                                                                                                                        |
| Secondary Subject Heading:      | Occupational and environmental medicine, Paediatrics, Public health, Respiratory medicine                                                                                                                                                                                                                                                           |
| Keywords:                       | EPIDEMIOLGY, Community child health < PAEDIATRICS, Cot death < PAEDIATRICS, Paediatric thoracic medicine < PAEDIATRICS, PUBLIC HEALTH                                                                                                                                                                                                               |
|                                 |                                                                                                                                                                                                                                                                                                                                                     |

SCHOLARONE™  
Manuscripts

only

# Ambient Air Pollution and Sudden Infant Death Syndrome: A case crossover study

Ian J Litchfield<sup>1\*</sup>, Jon G Ayres<sup>1</sup>, Jouni J K Jaakkola<sup>2</sup>, and Nuredin I Mohammed<sup>1</sup>

## Affiliations

1 Institute of Applied Health Research, College of Medical and Dental Sciences  
University of Birmingham  
Edgbaston, Birmingham, B15 2TT  
United Kingdom

2 Center for Environmental and Respiratory Health Research  
Institute of Health Sciences  
POB 5000 (Aapistie 1)  
University of Oulu,  
90014 Oulu, Finland

## \*Corresponding Author

Dr Ian J Litchfield

Address: Institute of Applied Health Research, College of Medical and Dental Sciences  
University of Birmingham  
Edgbaston, Birmingham, B15 2TT  
United Kingdom

Email: [i.litchfield@bham.ac.uk](mailto:i.litchfield@bham.ac.uk)

Telephone: +44 0121 414 6006

Fax: +44 0121 414 6217

Word count: 2460

Number of figures: 4

Number of tables: 4

## ABSTRACT

**Objectives:** Air pollution has been associated with increased mortality and morbidity in several studies with indications its effect could be more severe in children. This study examined the relationship between short-term variations in criteria air pollutants and occurrence of sudden infant death syndrome (SIDS). using data from the West Midlands region in the UK.

**Design:** We used a case-crossover study design. widely applied in air pollution studies and particularly useful for estimating the risk of a rare acute outcome associated with short-term exposure.

**Setting:** The study used data from the West Midlands region in the UK

**Participants:** We obtained daily time series data on SIDS mortality (ICD-9: 798.0 or ICD-10: R95) for the period 1996-2006 a total of 211 SIDS events.

**Primary outcome measures:** The association between short-term exposure to air pollution and the occurrence of SIDS events controlling for daily birth counts and average daily temperature.

**Results:** For an interquartile range increase in previous day pollutant concentration, the percentage increases (95% confidence interval) in SIDS were 16 (6, 28) for PM<sub>10</sub>, 1 (-7, 13) for SO<sub>2</sub>, 4 (-5, 13) for CO, -24 (-36, -5) for O<sub>3</sub>, 13 (0.1, 28) for NO<sub>2</sub>, and 1 (-4, 7) for NO. Results were qualitatively similar after additional control for index of multiple deprivation (IMD) scores for most of the lag structures investigated. PM<sub>10</sub> and NO<sub>2</sub> showed relatively consistent association which persisted across different lag structures and after adjusting for co-pollutants.

**Conclusions:** The results indicated ambient air pollutants, particularly PM<sub>10</sub> and NO<sub>2</sub>, were associated with increased SIDS mortality. Thus, future studies are recommended to

1  
2  
3 understand possible mechanistic explanations on the role of air pollution on SIDS incidence and  
4  
5 the ways in which we might reduce pollution exposure among infants.  
6  
7  
8  
9

10 **Clinical trial registration:** Not applicable.  
11  
12  
13

## 14 **Article Summary**

### 15 **Strengths and limitations of this study**

- 16 • Sudden infant death is the leading cause of death in healthy infants between one  
17 month and one year old. The exact cause is unknown though evidence suggests a  
18 respiratory trigger may be involved.
- 19 • Our study is the first based on time series data from the UK to investigate the  
20 relationship between common air pollutants and SIDS.
- 21 • We used a case-crossover design which is widely applied in air pollution studies and  
22 particularly useful for estimating the risk of a rare acute outcome associated with  
23 short-term exposure.
- 24 • We investigated various lags and multi-pollutant models indicating delayed effects of  
25 pollutants that persisted after controlling for co-pollutants.
- 26 • Our study is limited in power due to the comparatively small number of daily SIDS  
27 events.  
28  
29  
30  
31  
32  
33  
34  
35  
36  
37  
38  
39  
40  
41  
42  
43  
44  
45  
46  
47  
48  
49  
50  
51  
52  
53  
54  
55  
56  
57  
58  
59  
60

## INTRODUCTION

The quality of ambient air is an important factor in the health of adults and children. Ambient air quality is the second largest challenge facing public health in the UK.[1] According to the World Health Organisation (WHO), over 3.7 million premature deaths per annum may be attributed to the harmful effects of ambient air. Children it would seem are more vulnerable than any other group[2] and recent studies have indicated how even low-levels of traffic-related air pollution can have a negative impact on birth outcomes and perinatal health.[3, 4] A number of studies have also suggested a link between ambient air quality and the incidence of sudden infant death syndrome (SIDS).[5-10]

Sudden infant death is the leading cause of death in healthy infants between one month and one year old,[11] and the impact on the families is notably traumatic as the death is without warning or witness.[12] The exact cause is unknown though is likely the result of a combination of factors including susceptibility and environmental stressors such as lower social status of parents,[13] environmental tobacco smoke,[13, 14] the prone position[15] and the winter season.[5, 15] The impact of tobacco smoke suggests a respiratory trigger may be involved, however the evidence of an association between SIDS and air pollution warrant further research as findings from epidemiological studies have been inconsistent.[16, 17] and few have satisfactorily explore the impact of short-term exposure on SIDs. Our study is the first based on time series data from the UK to investigate the relationship between common air pollutants and SIDS. We have collated data from a ten-year period on concentrations of air pollution and onset of SIDS within the West Midlands one of the largest and most polluted conurbations in the UK.

## METHODS

### Data collection

We combined data on SIDS events with data on total births, air pollution, air temperature and a measure of deprivation.

#### Data on SIDS mortality and total births

We obtained daily time series data on SIDS mortality (ICD-9: 798.0 or ICD-10: R95) for the period 1996-2006 from the Perinatal Institute (PI). This data consisted of the date of death and the first three digits of the postcode to avoid the possibility of identifying individual cases due to the rare nature of SIDS. This allowed us to explore the effects of short-term exposure. We obtained daily births data with West Midlands' postcodes from the Office of National Statistics (ONS) for the period 1996-2006.

#### Air pollution data

The daily time series data on air pollution were compiled from the UK air quality archive managed by Department for the Environment, Food and Rural Affairs (DEFRA). These include a total of ten monitoring stations in the West Midlands measuring PM<sub>10</sub>, SO<sub>2</sub>, NO<sub>2</sub>, NO, NO<sub>x</sub>, CO and O<sub>3</sub> including sites within Birmingham, Coventry, Walsall and Wolverhampton. Before 1996 the reliability of air quality data was inconsistent. Not all monitoring stations had measurements for the range of pollutants over the entire study period and the precise pollutants measured at each monitoring centre are described in Table 1.

Table 1: Pollutants measured and corresponding time period by monitoring stations

| Name (postcode area)      | Pollutants                                                                                     | Time period <sup>a</sup> |
|---------------------------|------------------------------------------------------------------------------------------------|--------------------------|
| Birmingham Centre (B)     | PM <sub>10</sub> , SO <sub>2</sub> , NO <sub>2</sub> ,NO, NO <sub>x</sub> , CO, O <sub>3</sub> | 01/01/1996-31/12/2006    |
| Birmingham East (B)       | PM <sub>10</sub> , SO <sub>2</sub> , NO <sub>2</sub> ,NO, CO, O <sub>3</sub>                   | 01/01/1996-03/08/2004    |
| Birmingham Tyburn (B)     | PM <sub>10</sub> , SO <sub>2</sub> , NO <sub>2</sub> ,NO, CO, O <sub>3</sub>                   | 16/08/2004-31/12/2006    |
| Oldbury (B)               | PM <sub>10</sub> , SO <sub>2</sub> , NO <sub>2</sub> ,NO, NO <sub>x</sub> , CO, O <sub>3</sub> | 27/06/1997-20/09/1998    |
| West Bromwich (B)         | PM <sub>10</sub> , SO <sub>2</sub> , NO <sub>2</sub> ,NO, NO <sub>x</sub> , CO, O <sub>3</sub> | 04/11/1998-31/12/2006    |
| Coventry Centre (CV)      | PM <sub>10</sub> , SO <sub>2</sub> , NO <sub>2</sub> ,NO, NO <sub>x</sub> , CO, O <sub>3</sub> | 19/02/1997-31/12/2006    |
| Coventry Memorial (CV)    | PM <sub>10</sub> , SO <sub>2</sub> , NO <sub>2</sub> ,NO, NO <sub>x</sub> , CO, O <sub>3</sub> | 26/02/2001-31/12/2006    |
| Walsall Alumwell (WS)     | NO <sub>2</sub> , NO <sub>x</sub>                                                              | 01/01/1996-31/12/2006    |
| Walsall Willenhall (WS)   | NO <sub>2</sub>                                                                                | 13/05/1997-31/12/2006    |
| Wolverhampton Centre (WV) | PM <sub>10</sub> , SO <sub>2</sub> , NO <sub>2</sub> ,NO, NO <sub>x</sub> , CO, O <sub>3</sub> | 19/12/1995-31/12/2006    |

<sup>a</sup>Period with at least one pollutant being measured and taking into account missing data between start and end dates.



1  
2  
3 We aimed to examine the association between day-to-day variability in air pollution  
4 exposure and SIDS counts over the entire region rather than contrasting exposure and outcome  
5 between areas within the West Midlands region. Therefore the daily pollution data for West  
6 Midlands were calculated by averaging across all monitoring stations with available  
7 measurements.  
8  
9  
10  
11  
12  
13  
14  
15  
16

#### 17 Temperature data

18  
19 Data on daily minimum and maximum temperature were compiled for weather monitoring  
20 stations in the West Midlands from the Meteorological Office British Atmospheric Data Centre  
21 (BADC).[18] We used the average daily temperature which was calculated by taking the average  
22 of the minimum and maximum temperature at each monitoring station for each day to obtain the  
23 daily average temperature for the entire West Midlands.  
24  
25  
26  
27  
28  
29  
30  
31  
32

#### 33 Index of multiple deprivation (IMD) score

34  
35 The IMD score is a composite measure based on seven dimensions of deprivation  
36 including income deprivation, employment deprivation, health deprivation and disability,  
37 education deprivation, crime deprivation, barriers to housing and services deprivation and living  
38 environment deprivation. The data for the 2010 IMD at postcode level were downloaded from  
39 EDINA Digimap ShareGeo facility, an online spatial data repository.[19]  
40  
41  
42  
43  
44  
45  
46  
47  
48

#### 49 **Statistical analysis**

50  
51 The case-crossover design was used to investigate the association between short-term  
52 exposure to air pollution and the occurrence of SIDS events controlling for daily birth counts and  
53  
54  
55  
56  
57  
58  
59  
60

1  
2  
3 average daily temperature. This design, introduced by Maclure,[20] has been widely applied in  
4  
5 air pollution studies and is particularly useful for estimating the risk of a rare acute outcome  
6  
7 associated with short-term exposure.[21-24] In case-crossover design each case acts as their own  
8  
9 control and like case-control studies[25] the distribution of exposure is compared between  
10  
11 ‘cases’ and ‘controls’. That is, exposure at the time just prior to the event (‘case’ or ‘index’ time)  
12  
13 is compared with a set of ‘control’ times that represent the expected distribution of exposure for  
14  
15 non-event follow-up times. The design helps primarily to control for confounding by subject-  
16  
17 specific factors which remain static over time such as ethnicity and gender.  
18  
19  
20  
21  
22  
23

24 We applied the time stratified case-crossover approach where the strata are matching days  
25  
26 based on the same day of the week, calendar month and year. That is, control days were selected  
27  
28 from the same day of the week, within the same calendar month and year as the event day. We  
29  
30 applied a conditional Poisson regression model which has been shown to give equivalent  
31  
32 estimates as the conditional logistic model but with the advantage of readily allowing for  
33  
34 overdispersion and autocorrelation.[26] All our models assume a linear effect for air pollution  
35  
36 reported in previous studies[27-29] while temperature effects are likely to be non-linear and were  
37  
38 modelled using natural splines with 3 degrees of freedom.[30, 31]  
39  
40  
41  
42  
43

#### 44 Sensitivity analyses

45  
46  
47 The primary aim was to investigate the risk of SIDS events in relation to air pollution on  
48  
49 the previous day in single pollutant models. To examine sensitivities to our *a priori* model  
50  
51 specification, additional lag structures were explored including single lags of 0,1,2,...,6 days and  
52  
53 also the corresponding average of lags 0-1, 0-2, 0-3,..., 0-6. Moreover, the association between  
54  
55  
56  
57  
58  
59  
60

1  
2  
3 SIDS and air pollution was examined after adjusting for the effect of each of the pollutants PM<sub>10</sub>,  
4  
5 SO<sub>2</sub>, NO<sub>2</sub>, NO, CO and O<sub>3</sub> as a second pollutant in turn. The aim of this two-pollutant modelling  
6  
7 approach was to account for potential confounding effect of co-pollutants. Further control for  
8  
9 potential confounding effect of the IMD scores was made in both single and multi-pollutant  
10  
11 models after categorising the scores into five groups (quintiles). We excluded NO<sub>x</sub> from the  
12  
13 sensitivity analyses as it showed very strong correlation particularly with NO (r=0.96).  
14  
15  
16  
17  
18

19 Results are presented as percentage increases in mortality with 95% confidence intervals  
20  
21 (CIs) for an interquartile range (IQR) increase in pollutant concentration. Hypothesis tests were  
22  
23 two-sided with a significance level of 0.05. All analyses were performed using the R statistical  
24  
25 package.[32]  
26  
27  
28  
29  
30  
31  
32  
33  
34  
35  
36  
37  
38  
39  
40  
41  
42  
43  
44  
45  
46  
47  
48  
49  
50  
51  
52  
53  
54  
55  
56  
57  
58  
59  
60

## RESULTS

### Descriptive statistics

Over the study period (1996–2006), there were 211 SIDS events across the four postcode areas (B, CV, WS and WV) included in the analyses which accounted for about approximately 5% of the days within the study period (Table 2). In the same period and location, a total of 943,937 live (single) births were registered.

Table 2: Average air pollution, temperature and IMD scores for selected West Midlands postcode areas with SIDS and birth counts, 1996-2006

| Post town (area)      | PM <sub>10</sub> | SO <sub>2</sub> | CO  | O <sub>3</sub> | NO <sub>2</sub> | NO   | NO <sub>x</sub> | Temp.<br>(Min-<br>Max) | IMD<br>score | SIDS<br>event<br>event<br>(%) | Birth<br>count<br>count<br>(%) |
|-----------------------|------------------|-----------------|-----|----------------|-----------------|------|-----------------|------------------------|--------------|-------------------------------|--------------------------------|
| Birmingham<br>(B)     | 23.8             | 6.8             | 0.4 | 38.            | 33.9            | 17.5 | 60              | 7.2-12.8               | 36.6         | 118<br>(55.9)                 | 75384<br>4<br>(79.9)           |
| Coventry (CV)         | 18.3             | 11.3            | 0.3 | 32.<br>4       | 22.5            | 9.2  | 36.2            | 7.7-13.5               | 23.7         | 43<br>(20.4)                  | 91393<br>(9.7)                 |
| Walsall (WS)          |                  |                 |     |                | 41.5            |      | 89.4            | 6.4-14.0               | 25.2         | 24<br>(11.4)                  | 53532<br>(5.7)                 |
| Wolverhampton<br>(WV) | 23.8             | 9.3             | 0.5 | 38.<br>9       | 29.5            | 18.9 | 59.5            | 8.4-12.3               | 33.4         | 26<br>(12.3)                  | 45168<br>(4.8)                 |
| Total                 |                  |                 |     |                |                 |      |                 |                        |              | 211<br>(100)                  | 94393<br>7<br>(100)            |

1  
2  
3 The daily average air pollution concentrations and their standard deviations are presented  
4  
5 in Table 3 and show that average concentrations tended to be below UK air quality limits.  
6  
7  
8  
9  
10  
11  
12  
13  
14  
15  
16  
17  
18  
19  
20  
21  
22  
23  
24  
25  
26  
27  
28  
29  
30  
31  
32  
33  
34  
35  
36  
37  
38  
39  
40  
41  
42  
43  
44  
45  
46  
47  
48  
49  
50  
51  
52  
53  
54  
55  
56  
57  
58  
59  
60

Table 3: Descriptive statistics for daily SIDS mortality counts, air pollution, temperature and birth counts for West Midlands, 1996-2006

| Variable                 | Mean  | SD   | Median | IQR         | Min   | Max   |
|--------------------------|-------|------|--------|-------------|-------|-------|
| SIDS count               | 0.1   | 0.3  | 0.0    | 0-0         | 0.0   | 2.0   |
| Average temperature      | 10.2  | 5.4  | 10.2   | 6.2-14.5    | -4.2  | 25.0  |
| Max temperature          | 13.1  | 6.0  | 12.9   | 8.5-17.6    | -2.1  | 29.6  |
| Min temperature          | 7.4   | 5.1  | 7.5    | 3.6-11.4    | -7.5  | 20.7  |
| PM <sub>10</sub>         | 23.4  | 11.6 | 20.2   | 15.7-28.2   | 4.0   | 128.9 |
| SO <sub>2</sub>          | 8.5   | 6.9  | 7.2    | 4.4-10.2    | 0.0   | 70.8  |
| CO                       | 0.4   | 0.2  | 0.4    | 0.3-0.5     | 0.1   | 3.5   |
| O <sub>3</sub>           | 38.1  | 18.2 | 38.0   | 25.4-50.4   | 1.3   | 115.8 |
| NO <sub>2</sub>          | 33.2  | 14.3 | 31.2   | 22.3-41.8   | 5.9   | 113.0 |
| NO                       | 16.9  | 23.8 | 9.0    | 5.4-17.9    | 0.4   | 314.9 |
| NO <sub>x</sub>          | 64.5  | 49.3 | 51.1   | 35.2-76.4   | 7.9   | 569.2 |
| Birth count <sup>a</sup> | 289.8 | 33.9 | 295.0  | 266.0-314.0 | 183.0 | 387.0 |
| IMD score                | 32.3  | 12.6 | 31.7   | 21.3-40.5   | 7.2   | 54.9  |

<sup>a</sup>Counts are for single births only

1  
2  
3 Table 4 shows that there was generally a strong correlation between the levels of pollutants  
4 investigated with the exception of the weaker correlation between O<sub>3</sub> and PM<sub>10</sub> (r=-0.26) and  
5  
6 with SO<sub>2</sub> (r=-0.34).  
7  
8  
9  
10  
11  
12  
13  
14  
15  
16  
17  
18  
19  
20  
21  
22  
23  
24  
25  
26  
27  
28  
29  
30  
31  
32  
33  
34  
35  
36  
37  
38  
39  
40  
41  
42  
43  
44  
45  
46  
47  
48  
49  
50  
51  
52  
53  
54  
55  
56  
57  
58  
59  
60



Table 4: Pairwise Pearson correlations coefficients ( $r$ ) for pollutants and temperature

|                 | PM <sub>10</sub> | SO <sub>2</sub> | CO    | O <sub>3</sub> | NO <sub>2</sub> | NO    | NO <sub>x</sub> |
|-----------------|------------------|-----------------|-------|----------------|-----------------|-------|-----------------|
| SO <sub>2</sub> | 0.53             |                 |       |                |                 |       |                 |
| CO              | 0.56             | 0.59            |       |                |                 |       |                 |
| O <sub>3</sub>  | -0.26            | -0.34           | -0.56 |                |                 |       |                 |
| NO <sub>2</sub> | 0.66             | 0.56            | 0.76  | -0.62          |                 |       |                 |
| NO              | 0.54             | 0.48            | 0.87  | -0.58          | 0.73            |       |                 |
| NO <sub>x</sub> | 0.59             | 0.56            | 0.90  | -0.62          | 0.86            | 0.96  |                 |
| Temperature     | -0.08            | -0.24           | -0.39 | 0.40           | -0.40           | -0.38 | -0.40           |

1  
2  
3 Comparing the four postcode areas, Birmingham had the highest SIDS mortality (about  
4 56%) and births rates (about 80%). Air pollution concentrations were more or less similar for  
5 Birmingham and Wolverhampton except slightly lower levels of NO<sub>2</sub> and higher levels of SO<sub>2</sub>  
6 observed for the latter. Coventry had the lowest pollution level with respect to all pollutants  
7 except SO<sub>2</sub>. Walsall had measurements for NO<sub>2</sub> and NO<sub>x</sub> only which were very large compared  
8 to the other postcode areas (Table 2). Similarly, Birmingham and Wolverhampton had higher  
9 average deprivation scores compared to Coventry and Walsall (Table 2). Also, SIDS counts and  
10 pollution levels tended to be larger in highly deprived areas and near motorways and A-road  
11 networks which may be a reflection of population density (Figure 1; see Supplementary File:  
12 Figure S1).  
13  
14  
15  
16  
17  
18  
19  
20  
21  
22  
23  
24  
25  
26  
27

28 Looking at the temporal distribution of SIDS occurrence over the study period, the highest  
29 proportions of deaths were recorded in 1997 (about 14%), 1999 (about 13%) and 2003 (about  
30 12%). There was also indication of seasonal pattern for SIDS occurrence; the highest proportions  
31 of SIDS were observed in January and February (about 10%) and among the relatively colder  
32 months and in July (about 14%) among the warmer months (see Supplementary File: Table S1).  
33  
34  
35  
36  
37  
38  
39  
40  
41

### 42 **Case-crossover analysis**

43  
44 Figure 2 shows the estimated odds ratio (OR) (95% CI) for the association of SIDS events  
45 with each of the pollutants considered based on the conditional Poisson model. For an  
46 interquartile range increase in previous day pollutant concentration, the percentage increase  
47 (95% confidence interval) for the risk of SIDS death was 16 (6, 28);  $p = 0.001$  for PM<sub>10</sub>, 1 (-7,  
48 13);  $p = 0.84$  for SO<sub>2</sub>, 4 (-5, 13) ;  $p = 0.43$  for CO, -24 (-36, -5) ;  $p = 0.01$  for O<sub>3</sub>, 13 (0.1, 28)  
49  
50  
51  
52  
53  
54  
55  
56  
57  
58  
59  
60

1  
2  
3 ;  $p = 0.048$  for  $\text{NO}_2$ , 1 (-4, 7) ;  $p = 0.65$  for NO and 7 (-2, 17) ;  $p = 0.12$  for  $\text{NO}_x$ . Therefore,  
4  
5 considering pollutant levels at lag 1, significant association with increased risk of SIDS was  
6  
7 indicated only for  $\text{PM}_{10}$  and  $\text{NO}_2$  while a protective effect was apparent for  $\text{O}_3$  before controlling  
8  
9 for IMD. These results were similar at least qualitatively after adjusting for IMD but with  
10  
11 decreased OR for  $\text{PM}_{10}$  and increased OR for  $\text{NO}_2$ .  
12  
13  
14  
15  
16

### 17 **Sensitivity analyses**

18  
19 Lag structures: Analyses exploring relationships between SIDS and air pollution for other  
20  
21 lag structures (lags 0, 2, 3, ..., 6 and corresponding average of lags 0-1, 0-2, 0-3, ..., 0-6)  
22  
23 indicated associations were somewhat sensitive to the choice of lag (Figure 3). In the single lag  
24  
25 models, there was an impression of stronger delayed effects for CO,  $\text{NO}_2$ ,  $\text{O}_3$ ,  $\text{PM}_{10}$  and  $\text{SO}_2$   
26  
27 compared to relatively recent lags (lag 0 and lag 1). The effect of NO appeared to remain  
28  
29 comparatively flat across lags. Relatively more consistent association across lags was observed  
30  
31 for  $\text{NO}_2$  and  $\text{PM}_{10}$  and to some extent for CO. Likewise, in average lag models, ORs tended to  
32  
33 increase with averaging over more lags with exception of NO where such an effect was not  
34  
35 observed. However, only  $\text{PM}_{10}$ ,  $\text{NO}_2$  and  $\text{O}_3$  showed association across several lags after  
36  
37 additional control for IMD (see Supplementary File: Figure S2).  
38  
39  
40  
41  
42  
43  
44

45 Multi-pollutant models: Further investigation using two-pollutant models also showed  
46  
47 associations were sensitive to control of other pollutants. In general, adjusting for co-pollutants  
48  
49 appeared to attenuate ORs towards the null except for  $\text{NO}_2$  and  $\text{PM}_{10}$  where effects remained to  
50  
51 persist (Figure 4). Interestingly, after controlling for  $\text{PM}_{10}$ , the protective effect of  $\text{O}_3$  and the  
52  
53 adverse effect of  $\text{NO}_2$  observed in the single pollutant models were not apparent for most of the  
54  
55  
56  
57  
58  
59  
60

1  
2  
3 lag choices. Similarly, none of the other pollutants showed marked association with SIDS after  
4  
5 controlling for PM<sub>10</sub> effects. The estimates from the multi-pollutant model should, however, be  
6  
7 interpreted with caution as most of the pollutants were correlated.  
8  
9  
10  
11  
12  
13  
14  
15  
16  
17  
18  
19  
20  
21  
22  
23  
24  
25  
26  
27  
28  
29  
30  
31  
32  
33  
34  
35  
36  
37  
38  
39  
40  
41  
42  
43  
44  
45  
46  
47  
48  
49  
50  
51  
52  
53  
54  
55  
56  
57  
58  
59  
60

## COMMENTS

### Summary of findings

In this study we hypothesised a delayed effect (lag 1) of air pollution on SIDS incidence and investigated additional lags in sensitivity analyses both before and after controlling for IMD and in single and multi-pollutant models. We found evidence suggesting association of SIDS mortality with PM<sub>10</sub> and NO<sub>2</sub> exposure. Compared to other pollutants, their effects persisted after controlling for IMD, in multi-pollutant models and across the various lag structures investigated.

Though controlling for O<sub>3</sub> and IMD in the same model did attenuate the risk estimates observed for both PM<sub>10</sub> and NO<sub>2</sub>. There were no consistent associations observed with exposure to the remaining pollutants investigated (CO, SO<sub>2</sub>, NO, NO<sub>x</sub>). An exception was the protective effect observed in relation to O<sub>3</sub> exposure.

### Strengths and limitations

Previously studies had focused on relatively longer-term exposure to air pollutants.[33-35] Our study is one of the first to show the potential adverse effects of relatively short-term exposure to air pollution on SIDS occurrence. One of its key strengths is the investigation of various lags and multi-pollutant models indicating delayed effects of pollutants that persisted after controlling for co-pollutants. We acknowledge that our case-crossover study is limited in power due to the small number of daily SIDS events. Other epidemiological studies use data from ambient monitoring stations have shown a good level of correlation between daily personal exposure and daily ambient air pollution measurements,[36, 37] though there is the potential for measurement error that can attenuate regression coefficient estimates.

## Detailed discussion

Previous studies reported mixed results on the relationship between SIDS and air pollution. An earlier study using visibility as a surrogate for the level of air pollution in Taiwan reported adjusted rate ratio (ARR) of 3.8 (2.8–5.1) on the day of SIDS event comparing lowest versus highest visibility. The ARR increased to 5.1 (3.2–8.1) for visibility comparison during 9 days before SIDS occurrence.[5] Later studies with actual air pollution measurements also reported increased risk for SIDS mortality but with much reduced effect sizes. Woodruff et al. and Lipfert et al. found ORs (95% CI) of 1.12 (1.07–1.17) and 1.15 (1.07–1.24) respectively per 10  $\mu\text{g}/\text{m}^3$  increase in  $\text{PM}_{10}$ . [6, 38] A multi-city study from Canada reported about 17.7% increase in SIDS occurrence for an interquartile range increase in  $\text{SO}_2$  (lag 0) and  $\text{NO}_2$  (lag 2) that persisted in more rigorous models adjusting for weather and seasonality. They did not find associations for  $\text{O}_3$  and particulate pollution and the effect of  $\text{CO}$  was not robust to models choice; [8] Ritz et al. had also found such a negative association for  $\text{O}_3$  reporting ORs (95% CI) of 0.89 (0.82–0.96) and 0.93 (0.84–1.02) for single and multi-pollutant models respectively.[33] Similar to our results they highlighted that OR estimates were attenuated in multi-pollutant models. One possible reason for the negative association of  $\text{O}_3$  might be its negative correlation with other pollutants and it could also be confounded by season. For example, Woodruff et al. analysed  $\text{O}_3$  effect for different seasons and found adverse  $\text{O}_3$  effects in the summer season only [34] while Samet et al. reported similar effect for the summer but protective effect in the winter season.[39] However, Sarnat et al. argued that the negative association observed for  $\text{O}_3$  can be explained by its negative correlation with fine particulate matter pollution.[40]

## Conclusion

In conclusion, our findings suggest that air pollution exposure may increase risk of SIDS mortality. Thus, future studies are recommended to help understand possible mechanistic explanations on the role of air pollution on SIDS incidence and the ways in which we can reduce pollution exposure among infants.

For peer review only

## ACKNOWLEDGMENTS

**Funding:** This work was supported by The Lullaby Trust, grant number 260.

**Competing interests:** All authors declare: grants from The Lullaby Trust; no financial relationships with any organisations that might have an interest in the submitted work in the previous three years and no other relationships or activities that could appear to have influenced the submitted work.

**Author contributions statement:** NIM contributed to the research design, performed the data management, data analysis and interpretation, and drafted the initial manuscript; JGA contributed to the conceptualisation of the study, data interpretation and critically reviewed the manuscript; JJKJ contributed to the conceptualisation of the study, data interpretation and critically reviewed the manuscript; IJL contributed to the conceptualisation of the study, initial draft manuscript and supervised the research project at all stages. All authors approved the final manuscript as submitted.

**Transparency:** As lead author, I can confirm that the manuscript is an honest, accurate, and transparent account of the study being reported. No important aspects have been omitted and there are no discrepancies from the planned study.

**Ethics committee approval:** Ethical approval was given by the University of Birmingham, Life and Health Sciences Ethical Review Committee.



1  
2  
3  
4  
5  
6  
7  
8  
9  
10  
11  
12  
13  
14  
15  
16  
17  
18  
19  
20  
21  
22  
23  
24  
25  
26  
27  
28  
29  
30  
31  
32  
33  
34  
35  
36  
37  
38  
39  
40  
41  
42  
43  
44  
45  
46  
47  
48  
49  
50  
51  
52  
53  
54  
55  
56  
57  
58  
59  
60

**Data sharing:** No additional data available.

For peer review only

## REFERENCES

1. Royal College of Physicians, Royal College of Paediatrics and Child Health. Every breath we take: The lifelong impact of air pollution. 2016.  
<https://www.rcplondon.ac.uk/projects/outputs/every-breath-we-take-lifelong-impact-air-pollution> (accessed Apr 2017).
2. World Health Organization. Burden of disease from Ambient Air Pollution for 2012. 2014.  
[http://www.who.int/phe/health\\_topics/outdoorair/databases/AAP\\_BoD\\_results\\_March2014.pdf?ua=1](http://www.who.int/phe/health_topics/outdoorair/databases/AAP_BoD_results_March2014.pdf?ua=1) (accessed Apr 2017).
3. Brauer M, Lencar C, Tamburic L, et al. A cohort study of traffic-related air pollution impacts on birth outcomes. *Environ Health Perspect* 2008;116(5):680-6.
4. Fleischer NL, Merialdi M, van Donkelaar A, et al. Outdoor air pollution, preterm birth, and low birth weight: analysis of the World Health Organization global survey on maternal and perinatal health. *Environ Health Perspect* 2014;122(4):425-30.
5. Knobel HH, Chen CJ, Liang KY. Sudden infant death syndrome in relation to weather and optometrically measured air pollution in Taiwan. *Pediatrics* 1995;96(6):1106-10.
6. Lipfert FW, Zhang J, Wyzga RE. Infant mortality and air pollution: a comprehensive analysis of U.S. data for 1990. *J Air Waste Manag Assoc* 2000;50(8):1350-66.
7. Hunt CE. Sudden infant death syndrome and other causes of infant mortality: diagnosis, mechanisms, and risk for recurrence in siblings. *Am J Respir Crit Care Med* 2001;164(3):346-57.
8. Dales R, Burnett RT, Smith-Doiron M, et al. Air pollution and sudden infant death syndrome. *Pediatrics* 2004;113(6):e628-31.

- 1  
2  
3 9. Kaiser R, Romieu I, Medina S, et al. Air pollution attributable postneonatal infant mortality  
4 in U.S. metropolitan areas: a risk assessment study. *Environ Health* 2004;3(1):4.  
5  
6
- 7 10. Heinrich J, Slama R. Fine particles, a major threat to children. *Int J Hyg Environ Health*  
8 2007;210(5):617-22.  
9
- 10 11. National Institute of Child Health and Human Development. How many infants die from  
11 SIDS or are at risk for SIDS? 2013.  
12  
13 <https://www.nichd.nih.gov/health/topics/sids/conditioninfo/pages/risk.aspx> (accessed Apr  
14 2017).  
15  
16
- 17 12. Kinney HC, Thach BT. The sudden infant death syndrome. *N Engl J Med*  
18 2009;361(8):795-805.  
19  
20
- 21 13. Leach CE, Blair PS, Fleming PJ, et al. Epidemiology of SIDS and explained sudden infant  
22 deaths. CESDI SUDI Research Group. *Pediatrics* 1999;104(4):e43.  
23  
24
- 25 14. Brooke H, Gibson A, Tappin D, et al. Case-control study of sudden infant death syndrome  
26 in Scotland, 1992-5. *BMJ* 1997;314(7093):1516-20.  
27  
28
- 29 15. Douglas AS, Allan TM, Helms PJ. Seasonality and the Sudden Infant Death Syndrome  
30 during 1987-9 and 1991-3 in Australia and Britain. *BMJ* 1996;312(7043):1381-3.  
31  
32
- 33 16. Glinianaia SV, Rankin J, Bell R, et al. Does particulate air pollution contribute to infant  
34 death? A systematic review. *Environ Health Perspect* 2004;112(14):1365-70.  
35  
36
- 37 17. Tong S, Colditz P. Air pollution and sudden infant death syndrome: a literature review.  
38 *Paediatr Perinat Epidemiol* 2004;18(5):327-35.  
39  
40
- 41 18. National Centre for Atmospheric Science, Natural Environment Research Council. British  
42 Atmospheric Data Centre. [http://badc.nerc.ac.uk/home/index\\_beacon.html](http://badc.nerc.ac.uk/home/index_beacon.html) (accessed Apr  
43 2017).  
44  
45  
46  
47  
48  
49  
50  
51  
52  
53  
54  
55  
56  
57  
58  
59  
60

19. Pope A. "Indices of Deprivation England and Wales 2010" [ESRI Shapefile geospatial data]. 2013. <https://www.sharegeo.ac.uk/handle/10672/481> (accessed Dec 2016).
20. Maclure M. The case-crossover design: a method for studying transient effects on the risk of acute events. *Am J Epidemiol* 1991;133(2):144-53.
21. Lee JT, Schwartz J. Reanalysis of the effects of air pollution on daily mortality in Seoul, Korea: A case-crossover design. *Environ Health Perspect* 1999;107(8):633-6.
22. Jaakkola JJ. Case-crossover design in air pollution epidemiology. *Eur Respir J Suppl* 2003;40:81s-5s.
23. Pope CA 3rd, Muhlestein JB, May HT, et al. Ischemic heart disease events triggered by short-term exposure to fine particulate air pollution. *Circulation* 2006;114(23):2443-8.
24. Bhaskaran K, Hajat S, Armstrong B, et al. The effects of hourly differences in air pollution on the risk of myocardial infarction: case crossover analysis of the MINAP database. *BMJ* 2011;343:d5531.
25. Breslow NE, Day NE. *Statistical methods in cancer research. Volume I - The analysis of case-control studies.* IARC Sci Publ 1980;32:5-338.
26. Armstrong BG, Gasparrini A, Tobias A. Conditional Poisson models: a flexible alternative to conditional logistic case cross-over analysis. *BMC Med Res Methodol* 2014;14:122.
27. Le Tertre A, Medina S, Samoli E, et al. Short-term effects of particulate air pollution on cardiovascular diseases in eight European cities. *J Epidemiol Community Health* 2002;56(10):773-9.
28. Katsouyanni K, Samet JM, Anderson HR, et al. Air pollution and health: a European and North American approach (APHENA). *Res Rep Health Eff Inst* 2009;142:5-90.

- 1
- 2
- 3 29. Scheers H, Mwalili SM, Faes C, et al. Does air pollution trigger infant mortality in Western
- 4 Europe? A case-crossover study. *Environ Health Perspect* 2011;119(7):1017-22.
- 5
- 6
- 7 30. Braga AL, Zanobetti A, Schwartz J. The effect of weather on respiratory and
- 8 cardiovascular deaths in 12 U.S. cities. *Environ Health Perspect* 2002;110(9):859-63.
- 9
- 10
- 11 31. Armstrong B. Models for the relationship between ambient temperature and daily
- 12 mortality. *Epidemiology* 2006;17(6):624-31.
- 13
- 14
- 15 32. R Core Team. R: A Language and Environment for Statistical Computing. 2013.
- 16
- 17 <http://www.R-project.org> (accessed Apr 2017).
- 18
- 19
- 20
- 21 33. Ritz B, Wilhelm M, Zhao Y. Air pollution and infant death in southern California, 1989-
- 22 2000. *Pediatrics* 2006;118(2):493-502.
- 23
- 24
- 25 34. Woodruff TJ, Darrow LA, Parker JD. Air pollution and postneonatal infant mortality in the
- 26 United States, 1999-2002. *Environ Health Perspect* 2008;116(1):110-5.
- 27
- 28
- 29 35. Woodruff TJ, Parker JD, Schoendorf KC. Fine Particulate Matter (PM(2.5)) Air Pollution
- 30 and Selected Causes of Postneonatal Infant Mortality in California. *Environ Health*
- 31 *Perspect* 2006;114(5):786-90.
- 32
- 33
- 34 36. Janssen NA, Lanki T, Hoek G, et al. Associations between ambient, personal, and indoor
- 35 exposure to fine particulate matter constituents in Dutch and Finnish panels of
- 36 cardiovascular patients. *Occup Environ Med* 2005;62(12):868-77.
- 37
- 38
- 39 37. Williams R, Suggs J, Zweidinger R, et al. The 1998 Baltimore Particulate Matter
- 40 Epidemiology-Exposure Study: part 1. Comparison of ambient, residential outdoor, indoor
- 41 and apartment particulate matter monitoring. *J Expo Anal Environ Epidemiol* 2000;10:518-
- 42 32.
- 43
- 44
- 45
- 46
- 47
- 48
- 49
- 50
- 51
- 52
- 53
- 54
- 55
- 56
- 57
- 58
- 59
- 60

- 1  
2  
3 38. Woodruff TJ, Grillo J, Schoendorf KC. The relationship between selected causes of  
4 postneonatal infant mortality and particulate air pollution in the United States. Environ  
5 Health Perspect 1997;105(6):608-12.  
6  
7  
8  
9  
10 39. Samet JM, Dominici F, Curriero FC, et al. Fine particulate air pollution and mortality in 20  
11 U.S. cities, 1987–1994. N Engl J Med 2000;343(24):1742-9.  
12  
13  
14 40. Sarnat J, Schwartz J, Suh H. Comment on: Fine particulate air pollution and mortality in 20  
15 U.S. cities. N Engl J Med 2001;344(16):1253-4.  
16  
17  
18  
19  
20  
21  
22  
23

## 24 **FIGURE LEGENDS**

25  
26  
27  
28 **Fig. 1** Air pollution monitoring sites with road networks (motorways and A-roads) and SIDS events in the  
29 study area. We used ArcGIS Desktop 10.2 (<http://www.esri.com/software/arcgis>) to create the map  
30 combining shapefiles for postcode areas and motorways and overlaying air pollution and SIDS data.  
31  
32  
33

34  
35  
36  
37 **Fig. 2** Estimated risk of SIDS for an IQR increase in lag 1 pollutant concentration before and after  
38 controlling for quintiles of IMD scores  
39  
40  
41

42  
43 **Fig. 3** Risk of SIDS associated with an IQR increase in pollution for selected lags and average of lags  
44  
45  
46

47 **Fig. 4** Risk of SIDS associated with an IQR increase in air pollution after controlling for co-pollutants  
48 (panel titles indicate: main and co-pollutant respectively)  
49  
50  
51  
52  
53  
54  
55  
56  
57  
58  
59

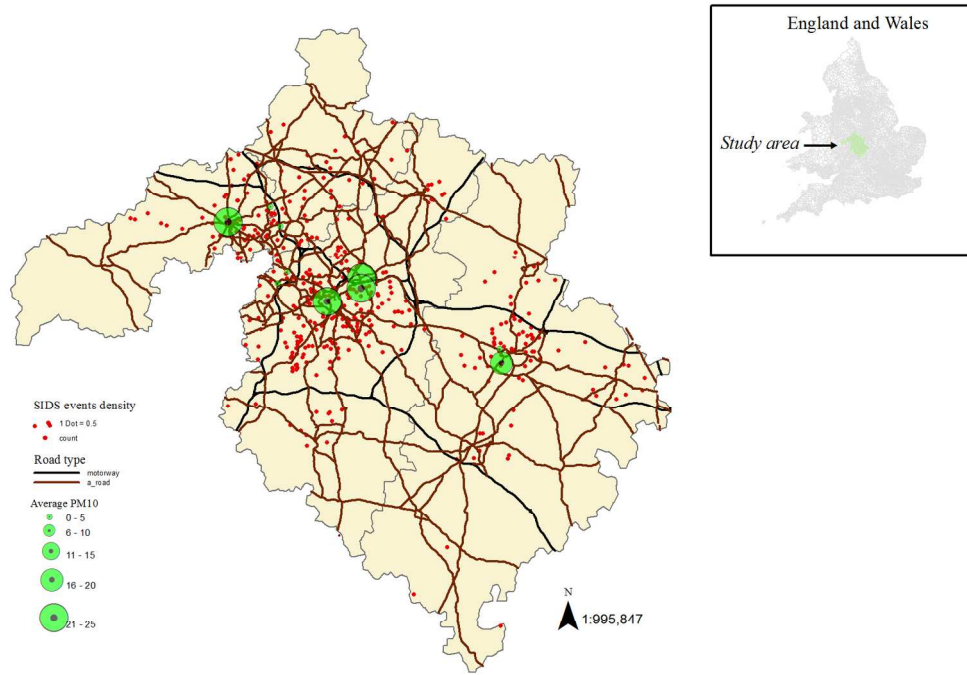

Air pollution monitoring sites with road networks (motorways and A-roads) and SIDS events in the study area. We used ArcGIS Desktop 10.2 (<http://www.esri.com/software/arcgis>) to create the map combining shapefiles for postcode areas and motorways and overlaying air pollution and SIDS data.

152x114mm (300 x 300 DPI)

View only

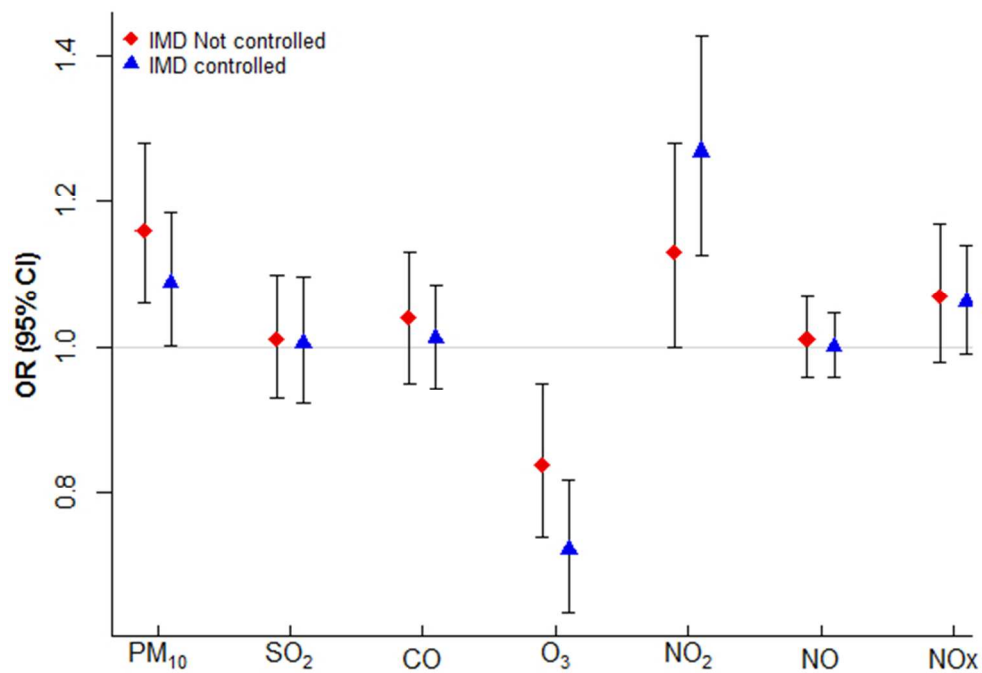

Estimated risk of SIDS for an IQR increase in lag 1 pollutant concentration before and after controlling for quintiles of IMD scores

160x109mm (96 x 96 DPI)



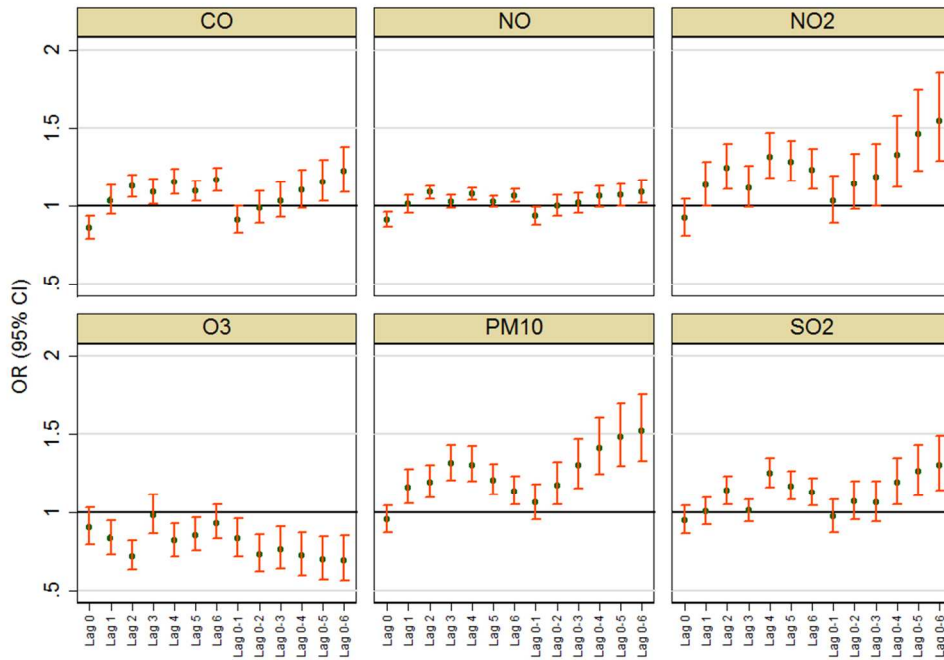

Risk of SIDS associated with an IQR increase in pollution for selected lags and average of lags

352x256mm (72 x 72 DPI)

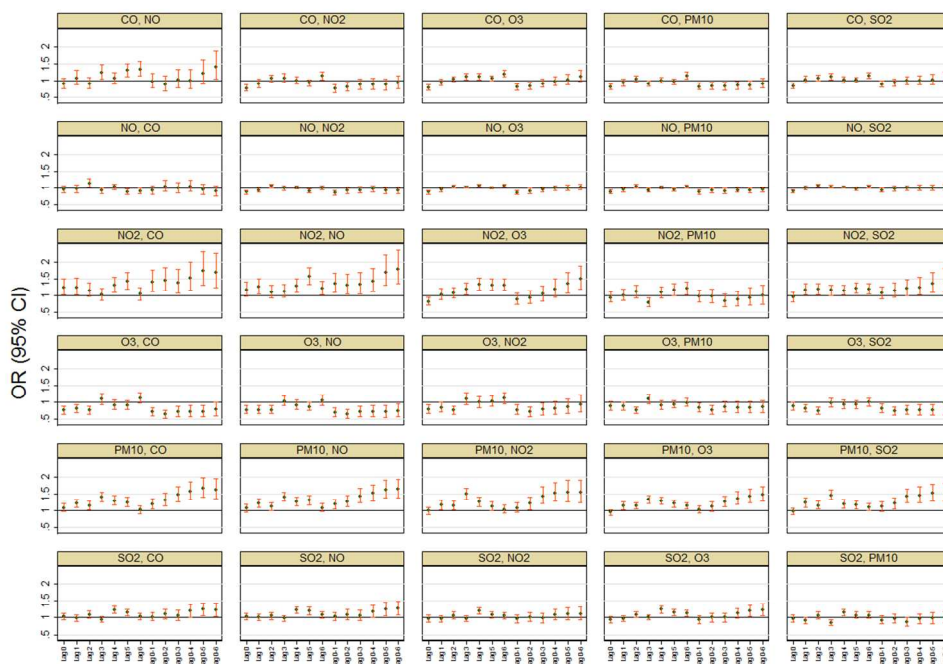

Risk of SIDS associated with an IQR increase in air pollution after controlling for co-pollutants (panel titles indicate: main and co-pollutant respectively)

438x319mm (72 x 72 DPI)

1  
2  
3  
4  
5  
6  
7  
8  
9  
10  
11  
12  
13  
14  
15  
16  
17  
18  
19  
20  
21  
22  
23  
24  
25  
26  
27  
28  
29  
30  
31  
32  
33  
34  
35  
36  
37  
38  
39  
40  
41  
42  
43  
44  
45  
46  
47  
48  
49  
50  
51  
52  
53  
54  
55  
56  
57  
58  
59  
60

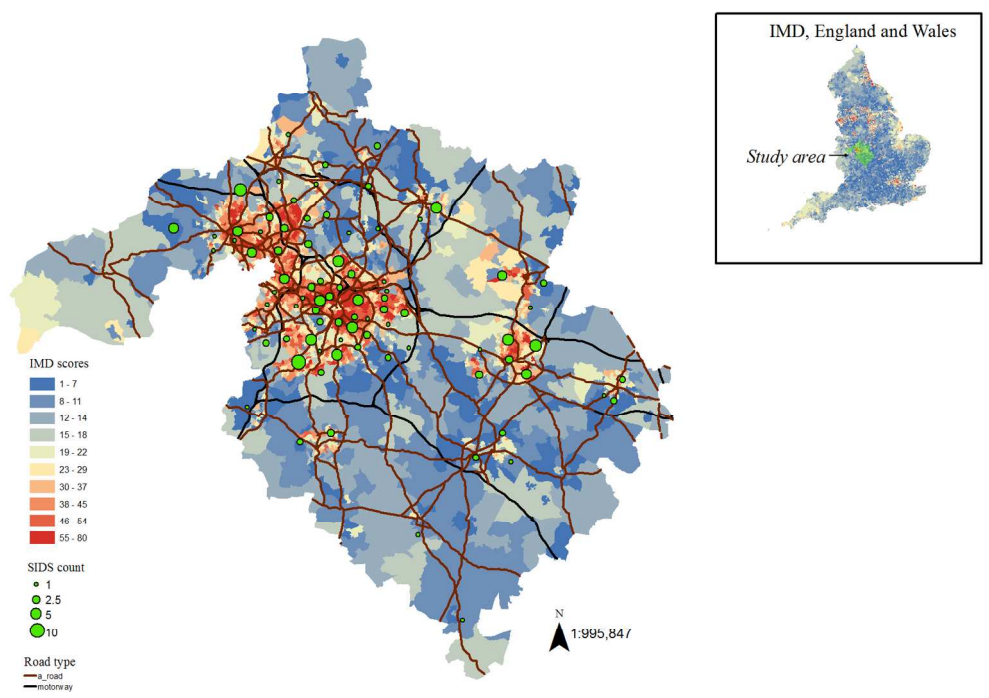

152x114mm (300 x 300 DPI)

Peer review only

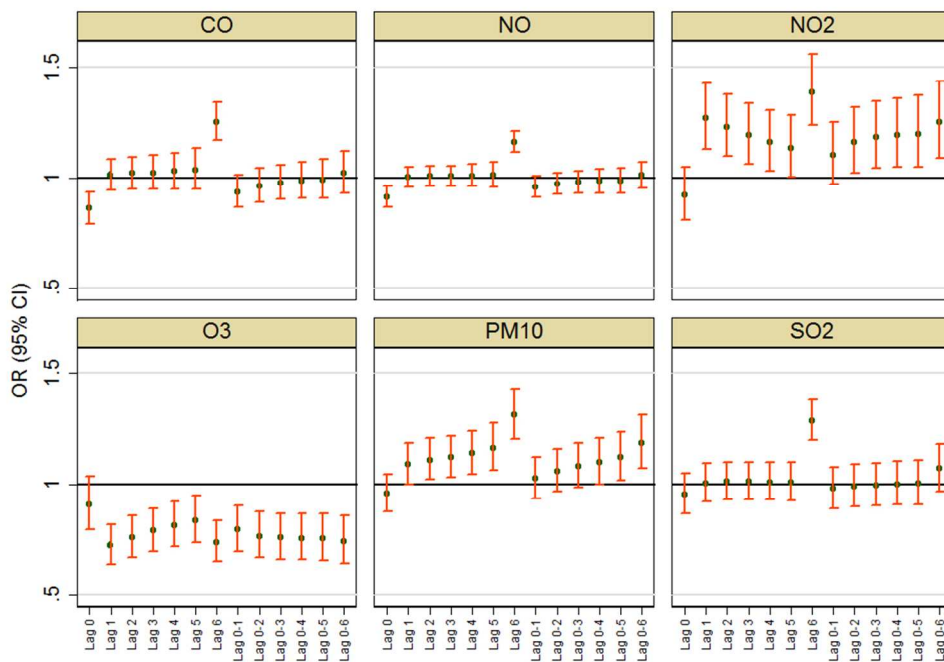

352x256mm (72 x 72 DPI)

Peer Review Only

## STROBE Statement—checklist of items that should be included in reports of observational studies

|                              | <b>Item No</b> | <b>Recommendation</b>                                                                                                                                                                                                                                                                          |
|------------------------------|----------------|------------------------------------------------------------------------------------------------------------------------------------------------------------------------------------------------------------------------------------------------------------------------------------------------|
| <b>Title and abstract</b>    | 1              | Ambient Air Pollution and Sudden Infant Death Syndrome: a case crossover study<br>Page 2                                                                                                                                                                                                       |
| <b>Introduction</b>          |                |                                                                                                                                                                                                                                                                                                |
| Background/rationale         | 2              | Page 4                                                                                                                                                                                                                                                                                         |
| Objectives                   | 3              | Page 4                                                                                                                                                                                                                                                                                         |
| <b>Methods</b>               |                |                                                                                                                                                                                                                                                                                                |
| Study design                 | 4              | Page 5                                                                                                                                                                                                                                                                                         |
| Setting                      | 5              | Page 5                                                                                                                                                                                                                                                                                         |
| Participants                 | 6              | Page 5                                                                                                                                                                                                                                                                                         |
| Variables                    | 7              | Page 6                                                                                                                                                                                                                                                                                         |
| Data sources/<br>measurement | 8*             | Page 5-7                                                                                                                                                                                                                                                                                       |
| Bias                         | 9              | Page 5-7                                                                                                                                                                                                                                                                                       |
| Study size                   | 10             | Page 5                                                                                                                                                                                                                                                                                         |
| Quantitative variables       | 11             | Page 7                                                                                                                                                                                                                                                                                         |
| Statistical methods          | 12             | (a) Describe all statistical methods, including those used to control for confounding<br>Page 5-7<br>(b) Describe any methods used to examine subgroups and interactions<br>Page 7<br>(c) Explain how missing data were addressed<br>Page 5<br>(e) Describe any sensitivity analyses<br>Page 8 |

Continued on next page

**Results**

|                          |     |                                                                                                                                                                                                             |
|--------------------------|-----|-------------------------------------------------------------------------------------------------------------------------------------------------------------------------------------------------------------|
| Participants             | 13* | (a) Report numbers of individuals at each stage of study—eg numbers potentially eligible, examined for eligibility, confirmed eligible, included in the study, completing follow-up, and analysed<br>Page 9 |
| Descriptive data         | 14* | (a) Give characteristics of study participants (eg demographic, clinical, social) and information on exposures and potential confounders<br>Page 9                                                          |
| Outcome data             | 15* | Page 10-11                                                                                                                                                                                                  |
| Main results             | 16  | Page 10-11                                                                                                                                                                                                  |
| Other analyses           | 17  | Page 12-13                                                                                                                                                                                                  |
| <b>Discussion</b>        |     |                                                                                                                                                                                                             |
| Key results              | 18  | Page 14                                                                                                                                                                                                     |
| Limitations              | 19  | Page 14                                                                                                                                                                                                     |
| Interpretation           | 20  | Page 15                                                                                                                                                                                                     |
| Generalisability         | 21  | Page 16                                                                                                                                                                                                     |
| <b>Other information</b> |     |                                                                                                                                                                                                             |
| Funding                  | 22  | The Lullaby Trust                                                                                                                                                                                           |

\*Give information separately for cases and controls in case-control studies and, if applicable, for exposed and unexposed groups in cohort and cross-sectional studies.

**Note:** An Explanation and Elaboration article discusses each checklist item and gives methodological background and published examples of transparent reporting. The STROBE checklist is best used in conjunction with this article (freely available on the Web sites of PLoS Medicine at <http://www.plosmedicine.org/>, Annals of Internal Medicine at <http://www.annals.org/>, and Epidemiology at <http://www.epidem.com/>). Information on the STROBE Initiative is available at [www.strobe-statement.org](http://www.strobe-statement.org).

# BMJ Open

## Is Ambient Air Pollution associated with onset of Sudden Infant Death Syndrome: A case crossover study in the UK

|                                 |                                                                                                                                                                                                                                                                                                                                                     |
|---------------------------------|-----------------------------------------------------------------------------------------------------------------------------------------------------------------------------------------------------------------------------------------------------------------------------------------------------------------------------------------------------|
| Journal:                        | <i>BMJ Open</i>                                                                                                                                                                                                                                                                                                                                     |
| Manuscript ID                   | bmjopen-2017-018341.R1                                                                                                                                                                                                                                                                                                                              |
| Article Type:                   | Research                                                                                                                                                                                                                                                                                                                                            |
| Date Submitted by the Author:   | 20-Dec-2017                                                                                                                                                                                                                                                                                                                                         |
| Complete List of Authors:       | Litchfield, Ian; University of Birmingham, Institute of Applied Health Research<br>Ayres, Jon; University of Birmingham, Institute of Applied Health Research<br>Jaakkola, Jouni; University of Oulu, Center for Environmental and Respiratory Health Research<br>Mohammed, Nuredin; University of Birmingham, Institute of Applied Health Research |
| <b>Primary Subject Heading</b>: | Epidemiology                                                                                                                                                                                                                                                                                                                                        |
| Secondary Subject Heading:      | Occupational and environmental medicine, Paediatrics, Public health, Respiratory medicine                                                                                                                                                                                                                                                           |
| Keywords:                       | EPIDEMIOLGY, Community child health < PAEDIATRICS, Cot death < PAEDIATRICS, Paediatric thoracic medicine < PAEDIATRICS, PUBLIC HEALTH                                                                                                                                                                                                               |
|                                 |                                                                                                                                                                                                                                                                                                                                                     |

SCHOLARONE™  
Manuscripts

only

# Is Ambient Air Pollution associated with onset of Sudden Infant Death Syndrome: A case crossover study in the UK

Ian J Litchfield<sup>1\*</sup>, Jon G Ayres<sup>1</sup>, Jouni J K Jaakkola<sup>2</sup>, and Nuredin I Mohammed<sup>1,3</sup>

## Affiliations

1 Institute of Applied Health Research, College of Medical and Dental Sciences  
University of Birmingham  
Edgbaston, Birmingham, B15 2TT  
United Kingdom

2 Center for Environmental and Respiratory Health Research  
Faculty of Medicine  
POB 5000 (Aapistie 5B)  
90014 Oulu, Finland

3 Medical Research Council Unit The Gambia  
Atlantic Road  
PO Box 273, Banjul  
The Gambia

## \*Corresponding Author

Dr Ian J Litchfield

Address: Institute of Applied Health Research, College of Medical and Dental Sciences  
University of Birmingham  
Edgbaston, Birmingham, B15 2TT  
United Kingdom

Email: [i.litchfield@bham.ac.uk](mailto:i.litchfield@bham.ac.uk)

Telephone: +44 0121 414 6006

Fax: +44 0121 414 6217



1  
2  
3  
4  
5 Word count: 3024

6 Number of figures: 4

7  
8 Number of tables: 4  
9  
10  
11  
12  
13  
14  
15  
16  
17  
18  
19  
20  
21  
22  
23  
24  
25  
26  
27  
28  
29  
30  
31  
32  
33  
34  
35  
36  
37  
38  
39  
40  
41  
42  
43  
44  
45  
46  
47  
48  
49  
50  
51  
52  
53  
54  
55  
56  
57  
58  
59  
60

For peer review only

## ABSTRACT

**Objectives:** Air pollution has been associated with increased mortality and morbidity in several studies with indications its effect could be more severe in children. This study examined the relationship between short-term variations in criteria air pollutants and occurrence of sudden infant death syndrome (SIDS).

**Design:** We used a case-crossover study design which is widely applied in air pollution studies and particularly useful for estimating the risk of a rare acute outcome associated with short-term exposure.

**Setting:** The study used data from the West Midlands region in the UK.

**Participants:** We obtained daily time series data on SIDS mortality (ICD-9: 798.0 or ICD-10: R95) for the period 1996-2006 with a total of 211 SIDS events.

**Primary outcome measures:** Daily counts of SIDS events.

**Results:** For an interquartile range increase in previous day pollutant concentration, the percentage increases (95% confidence interval) in SIDS were 16 (6, 27) for PM<sub>10</sub>, 1 (-7, 10) for SO<sub>2</sub>, 5 (-4, 14) for CO, -17 (-27, -6) for O<sub>3</sub>, 16 (2, 31) for NO<sub>2</sub>, and 2 (-3, 8) for NO after controlling for average temperature and national holidays. PM<sub>10</sub> and NO<sub>2</sub> showed relatively consistent association which persisted across different lag structures and after adjusting for co-pollutants.

**Conclusions:** The results indicated ambient air pollutants, particularly PM<sub>10</sub> and NO<sub>2</sub>, were associated with increased SIDS mortality. Thus, future studies are recommended to understand possible mechanistic explanations on the role of air pollution on SIDS incidence and the ways in which we might reduce pollution exposure among infants.

1  
2  
3 **Clinical trial registration:** Not applicable.  
4  
5  
6

7 **Keywords:** Air pollution; Child health; Time-series; Infant mortality.  
8  
9  
10

## 11 **Article Summary**

### 12 **Strengths and limitations of this study**

- 13 • Sudden infant death is the leading cause of death in healthy infants between one  
14 month and one year olds and our study is the first based on time series data from the  
15 UK to investigate the relationship between common air pollutants and SIDS.  
16
- 17 • Based on a case-crossover design, we found associations with onset of SIDS and  
18 concentration of PM<sub>10</sub> and NO<sub>2</sub> that lasted days after the initial exposure.  
19
- 20 • Though our study is limited in power due to the comparatively small number of daily  
21 SIDS events our chosen design is widely applied in air pollution studies and  
22 particularly useful for estimating the risk of a rare acute outcome associated with  
23 short-term exposure.  
24  
25  
26  
27  
28  
29  
30  
31  
32  
33  
34  
35  
36  
37  
38  
39  
40  
41  
42  
43  
44  
45

## 46 **INTRODUCTION**

47 The quality of ambient air is an important factor in the health of adults and children.  
48

49 Ambient air quality is the second largest challenge facing public health in the UK.[1] According  
50  
51  
52

1  
2  
3 to the World Health Organisation (WHO), over 3.7 million premature deaths per annum may be  
4 attributed to the harmful effects of ambient air. Children it would seem are more vulnerable than  
5 any other group[2] and recent studies have indicated how even low-levels of traffic-related air  
6 pollution can have a negative impact on birth outcomes and perinatal health.[3, 4] A number of  
7 studies have also suggested a link between ambient air quality and the incidence of sudden infant  
8 death syndrome (SIDS).[5-12] and here we examine the effects of the short term variations in air  
9 pollution and the onset of SIDS.  
10  
11  
12  
13  
14  
15  
16  
17  
18  
19  
20

21 Sudden infant death is the leading cause of death in healthy infants between one month and  
22 one year old,[13] and the impact on the families is notably traumatic as the death is without  
23 warning or witness.[14] The exact cause continues to tax researchers [15] though is likely the  
24 result of a combination of factors including susceptibility and environmental stressors such as  
25 lower social status of parents,[16] environmental tobacco smoke,[16, 17] the prone position[18]  
26 and the winter season.[5, 18] The impact of tobacco smoke suggests a respiratory trigger may be  
27 involved, however the evidence of an association between SIDS and air pollution warrant further  
28 research as findings from epidemiological studies have been inconsistent.[19, 20] and few have  
29 satisfactorily explored the impact of short-term exposure on SIDs. Our study is the first based on  
30 time series data from the UK to investigate the relationship between common air pollutants and  
31 SIDS. We have collated data from a ten-year period on concentrations of air pollution and onset  
32 of SIDS within the West Midlands one of the largest and most polluted conurbations in the UK  
33 and have conducted a case-crossover study to determine any associations.  
34  
35  
36  
37  
38  
39  
40  
41  
42  
43  
44  
45  
46  
47  
48  
49  
50  
51  
52  
53  
54  
55  
56  
57  
58  
59  
60

## METHODS

### Settings

The West Midlands is a metropolitan county in the centre of the UK. It has a population of some 2.8 million. [21] The West Midlands is one of the most heavily urbanized counties in the UK and forms the most populated conurbation in the UK outside London, It is at the heart of the UK motorway network and remains a significant centre of the UK's manufacturing industry.

### Data collection

We combined data on SIDS events with data on total births, air pollution, air temperature and a measure of deprivation.

#### Data on SIDS mortality and total births

We obtained daily time series data on SIDS mortality (ICD-9: 798.0 or ICD-10: R95) for the period 1996-2006 from the Perinatal Institute (PI). All cases were between 0 and 12 months old at onset. This data consisted of the date of death and the first three digits of the postcode to avoid the possibility of identifying individual cases due to the rare nature of SIDS. This allowed us to explore the effects of short-term exposure. We obtained daily births data with West Midlands' postcodes from the Office of National Statistics (ONS) for the period 1996-2006 and was used for descriptive analysis only.

### Air pollution data

The daily time series data on air pollution were compiled from the UK air quality archive managed by Department for the Environment, Food and Rural Affairs (DEFRA). These include a total of ten monitoring stations in the West Midlands measuring PM<sub>10</sub>, SO<sub>2</sub>, NO<sub>2</sub>, NO, NO<sub>x</sub>, CO and O<sub>3</sub> including sites within Birmingham, Coventry, Walsall and Wolverhampton. Before 1996 the reliability of air quality data was inconsistent. Not all monitoring stations had measurements for the range of pollutants over the entire study period and the precise pollutants measured at each monitoring centre are described in Table 1.

*Table 1: Pollutants measured and corresponding time period by monitoring stations*

| Name (postcode area)      | Pollutants                                                                                     | Time period <sup>a</sup> |
|---------------------------|------------------------------------------------------------------------------------------------|--------------------------|
| Birmingham Centre (B)     | PM <sub>10</sub> , SO <sub>2</sub> , NO <sub>2</sub> ,NO, NO <sub>x</sub> , CO, O <sub>3</sub> | 01/01/1996-31/12/2006    |
| Birmingham East (B)       | PM <sub>10</sub> , SO <sub>2</sub> , NO <sub>2</sub> ,NO, CO, O <sub>3</sub>                   | 01/01/1996-03/08/2004    |
| Birmingham Tyburn (B)     | PM <sub>10</sub> , SO <sub>2</sub> , NO <sub>2</sub> ,NO, CO, O <sub>3</sub>                   | 16/08/2004-31/12/2006    |
| Oldbury (B)               | PM <sub>10</sub> , SO <sub>2</sub> , NO <sub>2</sub> ,NO, NO <sub>x</sub> , CO, O <sub>3</sub> | 27/06/1997-20/09/1998    |
| West Bromwich (B)         | PM <sub>10</sub> , SO <sub>2</sub> , NO <sub>2</sub> ,NO, NO <sub>x</sub> , CO, O <sub>3</sub> | 04/11/1998-31/12/2006    |
| Coventry Centre (CV)      | PM <sub>10</sub> , SO <sub>2</sub> , NO <sub>2</sub> ,NO, NO <sub>x</sub> , CO, O <sub>3</sub> | 19/02/1997-31/12/2006    |
| Coventry Memorial (CV)    | PM <sub>10</sub> , SO <sub>2</sub> , NO <sub>2</sub> ,NO, NO <sub>x</sub> , CO, O <sub>3</sub> | 26/02/2001-31/12/2006    |
| Walsall Alumwell (WS)     | NO <sub>2</sub> , NO <sub>x</sub>                                                              | 01/01/1996-31/12/2006    |
| Walsall Willenhall (WS)   | NO <sub>2</sub>                                                                                | 13/05/1997-31/12/2006    |
| Wolverhampton Centre (WV) | PM <sub>10</sub> , SO <sub>2</sub> , NO <sub>2</sub> ,NO, NO <sub>x</sub> , CO, O <sub>3</sub> | 19/12/1995-31/12/2006    |

<sup>a</sup>Period with at least one pollutant being measured and taking into account missing data between start and end dates.

1  
2  
3 We aimed to examine the association between day-to-day variability in air pollution  
4 exposure and SIDS counts over the entire region rather than contrasting exposure and outcome  
5 between areas within the West Midlands region. Therefore the daily pollution data for West  
6 Midlands were calculated by averaging across all monitoring stations with available  
7 measurements as our models were based on the temporal relationship between air pollution and  
8 SIDS; we did not fit a spatial model.  
9  
10  
11  
12  
13  
14  
15  
16  
17  
18

#### 19 Temperature data

20  
21 Data on daily minimum and maximum temperature were compiled for weather monitoring  
22 stations in the West Midlands from the Meteorological Office British Atmospheric Data Centre  
23 (BADC).[22] We used the average daily temperature which was calculated by taking the average  
24 of the minimum and maximum temperature at each monitoring station for each day to obtain the  
25 daily average temperature for the entire West Midlands.  
26  
27  
28  
29  
30  
31  
32  
33  
34

#### 35 Index of multiple deprivation (IMD) score

36  
37 The IMD score is a composite measure based on seven dimensions of deprivation  
38 including income deprivation, employment deprivation, health deprivation and disability,  
39 education deprivation, crime deprivation, barriers to housing and services deprivation and living  
40 environment deprivation. The data for the 2010 IMD at postcode level were downloaded from  
41 EDINA Digimap ShareGeo facility, an online spatial data repository and was used for  
42 descriptive analysis only.[23]  
43  
44  
45  
46  
47  
48  
49  
50  
51  
52  
53  
54  
55  
56  
57  
58  
59  
60

## Statistical analysis

The case-crossover design was used to investigate the association between short-term exposure to air pollution and the occurrence of SIDS events controlling for average daily temperature and national holidays. This design, introduced by Maclure,[20] has been widely applied in air pollution studies and is particularly useful for estimating the risk of a rare acute outcome associated with short-term exposure.[24-27] In case-crossover design each case acts as their own control and like case-control studies[28] the distribution of exposure is compared between ‘cases’ and ‘controls’. That is, exposure at the time just prior to the event (‘case’ or ‘index’ time) is compared with a set of ‘control’ times that represent the expected distribution of exposure for non-event follow-up times. The design helps primarily to control for confounding by subject-specific factors which remain static over time such as ethnicity and gender.

We applied the time stratified case-crossover approach where the strata are matching days based on the same day of the week, calendar month and year that has previously been used to minimise bias. [29] That is, control days were selected from the same day of the week, within the same calendar month and year as the event day. We applied a conditional Poisson regression model which has been shown to give equivalent estimates as the conditional logistic model but with the advantage of readily allowing for overdispersion and autocorrelation.[30] All our models assume a linear effect for air pollution as reported in previous studies[31 -33] while temperature effects are likely to be non-linear and were modelled using natural splines with 3 degrees of freedom.[34-36]



## Sensitivity analyses

The primary aim was to investigate the risk of SIDS events in relation to air pollution on the previous day in single pollutant models. To examine sensitivities to our *a priori* model specification, additional lag structures were explored including single lags of 0,1,2,...,6 days and also the corresponding average of lags 0-1, 0-2, 0-3,..., 0-6. Moreover, the association between SIDS and air pollution was examined after adjusting for the effect of each of the pollutants PM<sub>10</sub>, SO<sub>2</sub>, NO<sub>2</sub>, NO, CO and O<sub>3</sub> as a second pollutant in turn. The aim of this two-pollutant modelling approach was to account for potential confounding effect of co-pollutants. Further sensitivity analyses were performed by controlling for minimum temperature instead of the average temperature. We excluded NO<sub>x</sub> from the sensitivity analyses as it showed very strong correlation particularly with NO ( $r=0.96$ ).

Results are presented as percentage increases in mortality with 95% confidence intervals (CIs) for an interquartile range (IQR) increase in pollutant concentration. Hypothesis tests were two-sided with a significance level of 0.05. All analyses were performed using the R statistical software; details of the packages used and sample line of code for fitting specific conditional Poisson regression model is given in the supplementary material.[37]

## RESULTS

### Descriptive statistics

Over the study period (1996–2006), there were 211 SIDS events across the four postcode areas (B, CV, WS and WV) included in the analyses which accounted for about approximately

1  
2  
3  
4  
5  
6  
7  
8  
9  
10  
11  
12  
13  
14  
15  
16  
17  
18  
19  
20  
21  
22  
23  
24  
25  
26  
27  
28  
29  
30  
31  
32  
33  
34  
35  
36  
37  
38  
39  
40  
41  
42  
43  
44  
45  
46  
47  
48  
49  
50  
51  
52  
53  
54  
55  
56  
57  
58  
59  
60

5% of the days within the study period (Table 2). In the same period and location, a total of 943,937 live (single) births were registered.

For peer review only

Table 2: Average air pollution ( $\mu\text{gm}^{-3}$ ), temperature ( $^{\circ}\text{C}$ ) and IMD scores for selected West Midlands postcode areas with SIDS and birth counts, 1996-2006

| Post town (area)      | PM <sub>10</sub> | SO <sub>2</sub> | CO  | O <sub>3</sub> | NO <sub>2</sub> | NO   | NO <sub>x</sub> | Temp.<br>(Min-Max) | IMD score | SIDS<br>event (%) | Birth count<br>(%) |
|-----------------------|------------------|-----------------|-----|----------------|-----------------|------|-----------------|--------------------|-----------|-------------------|--------------------|
| Birmingham (B)        | 23.8             | 6.8             | 0.4 | 38.5           | 33.9            | 17.5 | 60              | 7.2-12.8           | 36.6      | 118<br>(55.9)     | 753844<br>(79.9)   |
| Coventry (CV)         | 18.3             | 11.3            | 0.3 | 32.4           | 22.5            | 9.2  | 36.2            | 7.7-13.5           | 23.7      | 43<br>(20.4)      | 91393<br>(9.7)     |
| Walsall (WS)          |                  |                 |     |                | 41.5            |      | 89.4            | 6.4-14.0           | 25.2      | 24<br>(11.4)      | 53532<br>(5.7)     |
| Wolverhampton<br>(WV) | 23.8             | 9.3             | 0.5 | 38.9           | 29.5            | 18.9 | 59.5            | 8.4-12.3           | 33.4      | 26<br>(12.3)      | 45168<br>(4.8)     |
| Total                 |                  |                 |     |                |                 |      |                 |                    |           | 211<br>(100)      | 943937<br>(100)    |

1  
2  
3  
4  
5  
6  
7  
8  
9  
10  
11  
12  
13  
14  
15  
16  
17  
18  
19  
20  
21  
22  
23  
24  
25  
26  
27  
28  
29  
30  
31  
32  
33  
34  
35  
36  
37  
38  
39  
40  
41  
42  
43  
44  
45  
46  
47  
48  
49  
50  
51  
52  
53  
54  
55  
56  
57  
58  
59  
60

The daily average air pollution concentrations and their standard deviations are presented in Table 3 and show that average concentrations tended to be below UK air quality limits as defined by the EU Ambient Air Quality Directive.[38]

Table 3: Descriptive statistics for daily SIDS mortality counts, air pollution ( $\mu\text{g}\text{m}^{-3}$ ), temperature ( $^{\circ}\text{C}$ ) and birth counts for West Midlands, 1996-2006

| Variable                 | Mean | SD   | Median | IQR       | Min  | Max   |
|--------------------------|------|------|--------|-----------|------|-------|
| SIDS count               | <1   | <1   | 0      | 0-0       | 0    | 2     |
| Average temperature      | 10.2 | 5.4  | 10.2   | 6.2-14.5  | -4.2 | 25.0  |
| Max temperature          | 13.1 | 6.0  | 12.9   | 8.5-17.6  | -2.1 | 29.6  |
| Min temperature          | 7.4  | 5.1  | 7.5    | 3.6-11.4  | -7.5 | 20.7  |
| PM <sub>10</sub>         | 23.4 | 11.6 | 20.2   | 15.7-28.2 | 4.0  | 128.9 |
| SO <sub>2</sub>          | 8.5  | 6.9  | 7.2    | 4.4-10.2  | 0.0  | 70.8  |
| CO                       | 0.4  | 0.2  | 0.4    | 0.3-0.5   | 0.1  | 3.5   |
| O <sub>3</sub>           | 38.1 | 18.2 | 38.0   | 25.4-50.4 | 1.3  | 115.8 |
| NO <sub>2</sub>          | 33.2 | 14.3 | 31.2   | 22.3-41.8 | 5.9  | 113.0 |
| NO                       | 16.9 | 23.8 | 9.0    | 5.4-17.9  | 0.4  | 314.9 |
| NO <sub>x</sub>          | 64.5 | 49.3 | 51.1   | 35.2-76.4 | 7.9  | 569.2 |
| Birth count <sup>a</sup> | 290  | 34   | 296    | 266 - 314 | 183  | 387   |
| IMD score                | 32.3 | 12.6 | 31.7   | 21.3-40.5 | 7.2  | 54.9  |

<sup>a</sup> Counts are for single births only

1  
2  
3 Table 4 shows that there was generally a strong correlation between the levels of pollutants  
4 investigated with the exception of the weaker correlation between O<sub>3</sub> and PM<sub>10</sub> (r=-0.26) and  
5 with SO<sub>2</sub> (r=-0.34). What was also notable was the negative correlation between Ozone and the  
6 other pollutants and how in contrast to the other pollutants its positive correlation with  
7 temperature.  
8  
9  
10  
11  
12  
13  
14  
15  
16  
17  
18  
19  
20  
21  
22  
23  
24  
25  
26  
27  
28  
29  
30  
31  
32  
33  
34  
35  
36  
37  
38  
39  
40  
41  
42  
43  
44  
45  
46  
47  
48  
49  
50  
51  
52  
53  
54  
55  
56  
57  
58  
59  
60

1  
2  
3 *Table 4: Pairwise Pearson correlations coefficients (r) for pollutants and*  
4  
5 *temperature*  
6

7

|    | PM <sub>10</sub> | SO <sub>2</sub> | CO    | O <sub>3</sub> | NO <sub>2</sub> | NO    | NO <sub>x</sub> |
|----|------------------|-----------------|-------|----------------|-----------------|-------|-----------------|
| 8  |                  |                 |       |                |                 |       |                 |
| 9  |                  |                 |       |                |                 |       |                 |
| 10 | SO <sub>2</sub>  | 0.53            |       |                |                 |       |                 |
| 11 |                  |                 |       |                |                 |       |                 |
| 12 | CO               | 0.56            | 0.59  |                |                 |       |                 |
| 13 |                  |                 |       |                |                 |       |                 |
| 14 | O <sub>3</sub>   | -0.26           | -0.34 | -0.56          |                 |       |                 |
| 15 |                  |                 |       |                |                 |       |                 |
| 16 | NO <sub>2</sub>  | 0.66            | 0.56  | 0.76           | -0.62           |       |                 |
| 17 |                  |                 |       |                |                 |       |                 |
| 18 | NO               | 0.54            | 0.48  | 0.87           | -0.58           | 0.73  |                 |
| 19 |                  |                 |       |                |                 |       |                 |
| 20 | NO <sub>x</sub>  | 0.59            | 0.56  | 0.90           | -0.62           | 0.86  | 0.96            |
| 21 |                  |                 |       |                |                 |       |                 |
| 22 | Temperature      | -0.08           | -0.24 | -0.39          | 0.40            | -0.40 | -0.38           |
| 23 |                  |                 |       |                |                 |       |                 |
| 24 |                  |                 |       |                |                 |       |                 |
| 25 |                  |                 |       |                |                 |       |                 |
| 26 |                  |                 |       |                |                 |       |                 |
| 27 |                  |                 |       |                |                 |       |                 |
| 28 |                  |                 |       |                |                 |       |                 |
| 29 |                  |                 |       |                |                 |       |                 |
| 30 |                  |                 |       |                |                 |       |                 |
| 31 |                  |                 |       |                |                 |       |                 |
| 32 |                  |                 |       |                |                 |       |                 |
| 33 |                  |                 |       |                |                 |       |                 |
| 34 |                  |                 |       |                |                 |       |                 |
| 35 |                  |                 |       |                |                 |       |                 |
| 36 |                  |                 |       |                |                 |       |                 |
| 37 |                  |                 |       |                |                 |       |                 |
| 38 |                  |                 |       |                |                 |       |                 |
| 39 |                  |                 |       |                |                 |       |                 |
| 40 |                  |                 |       |                |                 |       |                 |
| 41 |                  |                 |       |                |                 |       |                 |
| 42 |                  |                 |       |                |                 |       |                 |
| 43 |                  |                 |       |                |                 |       |                 |
| 44 |                  |                 |       |                |                 |       |                 |
| 45 |                  |                 |       |                |                 |       |                 |
| 46 |                  |                 |       |                |                 |       |                 |
| 47 |                  |                 |       |                |                 |       |                 |
| 48 |                  |                 |       |                |                 |       |                 |
| 49 |                  |                 |       |                |                 |       |                 |
| 50 |                  |                 |       |                |                 |       |                 |
| 51 |                  |                 |       |                |                 |       |                 |
| 52 |                  |                 |       |                |                 |       |                 |
| 53 |                  |                 |       |                |                 |       |                 |
| 54 |                  |                 |       |                |                 |       |                 |
| 55 |                  |                 |       |                |                 |       |                 |
| 56 |                  |                 |       |                |                 |       |                 |
| 57 |                  |                 |       |                |                 |       |                 |
| 58 |                  |                 |       |                |                 |       |                 |
| 59 |                  |                 |       |                |                 |       |                 |
| 60 |                  |                 |       |                |                 |       |                 |

1  
2  
3 Comparing the four postcode areas, Birmingham had the highest SIDS mortality (about  
4 56%) and births rates (about 80%). Air pollution concentrations were more or less similar for  
5 Birmingham and Wolverhampton except slightly lower levels of NO<sub>2</sub> and higher levels of SO<sub>2</sub>  
6 observed for the latter. Coventry had the lowest pollution level with respect to all pollutants  
7 except SO<sub>2</sub>. Walsall had measurements for NO<sub>2</sub> and NO<sub>x</sub> only which were very large compared  
8 to the other postcode areas (Table 2). Similarly, Birmingham and Wolverhampton had higher  
9 average deprivation scores compared to Coventry and Walsall (Table 2). Also, SIDS counts and  
10 pollution levels tended to be larger in highly deprived areas and near motorways and A-road  
11 networks which may be a reflection of population density (Figure 1; see Supplementary File:  
12 Figure S1). There was also indication of seasonal pattern for SIDS occurrence; the highest  
13 proportions of SIDS were observed in January and February (about 10%) and among the  
14 relatively colder months and in July (about 14%) among the warmer months (data not shown).  
15  
16  
17  
18  
19  
20  
21  
22  
23  
24  
25  
26  
27  
28  
29  
30  
31  
32

### 33 **Case-crossover analysis**

34  
35 Figure 2 shows the estimated odds ratio (OR) (95% CI) for the association of SIDS events  
36 with each of the pollutants considered based on the conditional Poisson model. For an  
37 interquartile range increase in previous day pollutant concentration, the percentage increase  
38 (95% confidence interval) for the risk of SIDS death was 16 (6, 27);  $p = 0.002$  for PM<sub>10</sub>, 1 (-7,  
39 10);  $p = 0.83$  for SO<sub>2</sub>, 5 (-4, 14);  $p = 0.33$  for CO, -17 (-27, -6) ;  $p = 0.004$  for O<sub>3</sub>, 16 (2, 31);  $p =$   
40 0.02 for NO<sub>2</sub>, 2 (-3, 8);  $p = 0.47$  for NO and 8 (-1, 18);  $p = 0.07$  for NO<sub>x</sub> after controlling for  
41 average temperature and national holidays. Therefore, considering pollutant levels at lag 1,  
42 significant association with increased risk of SIDS was indicated only for PM<sub>10</sub> and NO<sub>2</sub> while a  
43 protective effect was apparent for O<sub>3</sub>.  
44  
45  
46  
47  
48  
49  
50  
51  
52  
53  
54  
55  
56  
57  
58  
59  
60



## Sensitivity analyses

Lag structures: Analyses exploring relationships between SIDS and air pollution for other lag structures (lags 0, 2, 3, ..., 6 and corresponding average of lags 0-1, 0-2, 0-3, ..., 0-6) indicated associations were somewhat sensitive to the choice of lag (Figure 3). In the single lag models, there was an impression of stronger delayed effects for CO, NO<sub>2</sub>, O<sub>3</sub>, PM<sub>10</sub> and SO<sub>2</sub> compared to relatively recent lags (lag 0 and lag 1). The effect of NO appeared to remain comparatively flat across lags. Relatively more consistent association across lags was observed for NO<sub>2</sub> and PM<sub>10</sub> and to some extent for CO. Likewise, in average lag models, ORs tended to increase with averaging over more lags with exception of NO where such an effect was not observed. Results were also similar (at least qualitatively) after adjusting for minimum temperature instead of the average temperature (see Supplementary File: Figure S2).

Multi-pollutant models: Further investigation using two-pollutant models also showed associations were sensitive to control of other pollutants. In general, adjusting for co-pollutants appeared to attenuate ORs towards the null except for NO<sub>2</sub> and PM<sub>10</sub> where effects remained to persist (Figure 4). Interestingly, after controlling for PM<sub>10</sub>, the protective effect of O<sub>3</sub> and the adverse effect of NO<sub>2</sub> observed in the single pollutant models were not apparent for most of the lag choices. Similarly, none of the other pollutants showed marked association with SIDS after controlling for PM<sub>10</sub> effects. The estimates from the multi-pollutant model should, however, be interpreted with caution as most of the pollutants were correlated.

## COMMENTS

### Summary of findings

In this study we hypothesised a delayed effect (lag 1) of air pollution on SIDS incidence and investigated additional lags in sensitivity analyses and in single and multi-pollutant models. Though confidence intervals were wide, we found evidence suggesting association of SIDS mortality with PM<sub>10</sub> and NO<sub>2</sub> exposure. Compared to other pollutants, their effects persisted after controlling for co-pollutants and across the various lag structures investigated. The exception was controlling for O<sub>3</sub> did attenuate the risk estimates observed for both PM<sub>10</sub> and NO<sub>2</sub>. There were no consistent associations observed with exposure to the remaining pollutants investigated (CO, SO<sub>2</sub>, NO, NO<sub>x</sub>). An exception was the protective effect observed in relation to O<sub>3</sub> exposure.

### Strengths and limitations

Previous studies have tended to focus on relatively longer-term exposure to air pollutants.[39-41] Our study is one of the first to use case-crossover methodology to explore the impact of air pollution on SIDS based on data from UK. Using an approach that is suitable for estimating the risk of a rare acute outcome such as SIDS events, we were able to investigate various lags and multi-pollutant models indicating delayed effects of pollutants that persisted after controlling for co-pollutants. However, measurement error for air pollution exposure a potential limitation in this study as we did not use personal measurements. Other epidemiological studies using data from ambient monitoring stations have shown a good level of correlation between daily personal exposure and daily ambient air pollution measurements,[36, 37] though

1  
2  
3 there is the potential for measurement error that can attenuate regression coefficient estimates.  
4  
5 That is, such misclassification will likely lead to an under estimation of the effects. We were also  
6  
7 unable to control for influenza and humidity as we did not have access to reliable data for these  
8  
9 variables.  
10

### 11 12 13 14 15 **Detailed discussion**

16  
17 Certain groups of the population are more vulnerable to ambient air pollution than others  
18  
19 and children figure predominantly amongst them due to the fragility of their immune system and  
20  
21 the ratio of their lung capacity to their size. [42] Particulate matter has been recognised as the  
22  
23 most significant contributor to air quality related morbidity and mortality [43] and a number of  
24  
25 studies have reported a link between infant mortality and PM<sub>10</sub> at similar concentrations of  
26  
27 pollutant below air quality guidelines as are described in this study.[44-46, 11] However  
28  
29 previous evidence of a direct association with SIDS is inconclusive and few studies describe a  
30  
31 significant association of PM<sub>10</sub> with increased risk. [6, 47]  
32  
33  
34

35  
36 The potential association with NO<sub>2</sub> we found reflected the findings of a multi-city study  
37  
38 from Canada that found an increased risk for SIDS with a lag of two-days.[8] The issue of lag is  
39  
40 interesting we found the strongest association with SIDS with PM<sub>10</sub> and NO<sub>2</sub> occurred over  
41  
42 several lags in line with previous studies that have found evidence of a lag between exposure to  
43  
44 criteria pollutants and mortality. For PM<sub>10</sub>, a single days exposure has been shown to have an  
45  
46 effect for up to 5 days [48, 49] and numbers of respiratory deaths appear to be more affected by  
47  
48 air pollution levels on previous days, than cardiovascular deaths that are impacted by same-day  
49  
50 pollution.[50] For example myocardial infarction represents an acute response to a trigger.[51]  
51  
52  
53  
54  
55  
56  
57  
58  
59  
60

1  
2  
3 This is biologically plausible when considering how a wider and more lagged response can  
4 be expected for deaths from respiratory responses to pollution (eg, COPD) via the proposed  
5 mechanisms, such as pulmonary or systemic inflammation and modulated immunity.[52]

6  
7  
8 With regards the apparent protective properties of O<sub>3</sub> that we describe here it's worth noting that  
9 these have been seen previously.[40] One possible reason for the negative association of O<sub>3</sub> and  
10 SIDS might be its negative correlation with other pollutants, in particular that with fine  
11 particulate matter pollution.[53] O<sub>3</sub> also showed a positive correlation with temperature while all  
12 other pollutants were negatively correlated.  
13  
14  
15  
16  
17  
18  
19  
20  
21  
22  
23

24 Concern around the effects of air pollution continue to mount particularly within developing  
25 economies [54] where it contributes to 3.3 million premature deaths worldwide per year a figure  
26 estimated to double by 2050 if the issue remains unattended.[55] However it appears that  
27 recently fossil fuel emissions have begun to increase again due to the developing world's  
28 reliance on them to power their expanding economies.[56] In the developed West, policy  
29 initiatives are beginning to recognise the mounting issue posed by the adverse effects on health  
30 posed by ambient air pollution. However shifting political priorities in the United States has seen  
31 a commitment to revitalise the coal industry [57] and an increase in the production of shale oil  
32 [58] However mitigating these risks is not a straightforward proposition and government policies  
33 appear slow to react, for example in the UK pledges to cease sales of diesel and petrol cars do  
34 not come into effect until 2040.[59]  
35  
36  
37  
38  
39  
40  
41  
42  
43  
44  
45  
46  
47  
48

49 In the absence of coherent policy to address the issue a number of proposals have been put  
50 forward to mitigate the effects of high levels of ambient exposure. Knowing that children and  
51 young adults may be highly susceptible to some of the subclinical changes caused by air  
52  
53  
54  
55  
56  
57  
58  
59  
60

1  
2  
3 pollution [60,61] and as indoor concentrations are lower than ambient levels advice has been to  
4 remain indoors to reduce exposure and acute health risks on high air pollution days.[62] There  
5 are also systems available for cleaning indoor air though these may be deemed expensive for the  
6 economically deprived.[63] There has also been a case made for chemo-preventive interventions,  
7 such as antioxidant or antithrombotic agents, but without data on health outcomes, no  
8 recommendations can be made in their use for primary prevention. [64]  
9  
10  
11  
12  
13  
14  
15  
16  
17  
18

## 19 **Conclusions**

20  
21 Understanding the effects of air pollution on child health is more relevant than ever. Our work  
22 here has highlighted a potential association of Sudden Infant Death with PM<sub>10</sub> and NO<sub>2</sub> and the  
23 association with particulate matter and infant mortality in particular is widely recognised.  
24 However, until policy reflects the growing evidence and responds to mounting public concern, it  
25 would appear to be the responsibility of individuals to take independent action to mitigate the  
26 effects of air pollution and protect the health of their young ones.  
27  
28  
29  
30  
31  
32  
33  
34  
35  
36  
37  
38  
39  
40  
41  
42  
43  
44  
45  
46  
47  
48  
49  
50  
51  
52  
53  
54  
55  
56  
57  
58  
59  
60

## ACKNOWLEDGMENTS

**Funding:** This work was supported by The Lullaby Trust, grant number 260.

**Competing interests:** All authors declare: grants from The Lullaby Trust; no financial relationships with any organisations that might have an interest in the submitted work in the previous three years and no other relationships or activities that could appear to have influenced the submitted work.

**Author contributions statement:** IJL contributed to the conceptualisation of the study, initial draft manuscript and supervised the research project at all stages. NIM contributed to the research design, performed the data management, analysis and interpretation, and with IJL drafted the initial manuscript; JGA contributed to the conceptualisation of the study, data interpretation and critically reviewed the manuscript; JJKJ contributed to the conceptualisation of the study, data interpretation and critically reviewed the manuscript; All authors approved the final manuscript as submitted.

**Transparency:** As lead author, I can confirm that the manuscript is an honest, accurate, and transparent account of the study being reported. No important aspects have been omitted and there are no discrepancies from the planned study.

**Ethics committee approval:** Ethical approval was given by the University of Birmingham, Life and Health Sciences Ethical Review Committee.

**Data sharing:** No additional data available.

## REFERENCES

1. Royal College of Physicians, Royal College of Paediatrics and Child Health. Every breath we take: The lifelong impact of air pollution. 2016.  
<https://www.rcplondon.ac.uk/projects/outputs/every-breath-we-take-lifelong-impact-air-pollution> (accessed Apr 2017).
2. World Health Organization. Burden of disease from Ambient Air Pollution for 2012. 2014.  
[http://www.who.int/phe/health\\_topics/outdoorair/databases/AAP\\_BoD\\_results\\_March2014.pdf?ua=1](http://www.who.int/phe/health_topics/outdoorair/databases/AAP_BoD_results_March2014.pdf?ua=1) (accessed Apr 2017).
3. Brauer M, Lencar C, Tamburic L, et al. A cohort study of traffic-related air pollution impacts on birth outcomes. *Environ Health Perspect* 2008;116(5):680-6.
4. Fleischer NL, Merialdi M, van Donkelaar A, et al. Outdoor air pollution, preterm birth, and low birth weight: analysis of the World Health Organization global survey on maternal and perinatal health. *Environ Health Perspect* 2014;122(4):425-30.
5. Knobel HH, Chen CJ, Liang KY. Sudden infant death syndrome in relation to weather and optometrically measured air pollution in Taiwan. *Pediatrics* 1995;96(6):1106-10.
6. Lipfert FW, Zhang J, Wyzga RE. Infant mortality and air pollution: a comprehensive analysis of U.S. data for 1990. *J Air Waste Manag Assoc* 2000;50(8):1350-66.
7. Hunt CE. Sudden infant death syndrome and other causes of infant mortality: diagnosis, mechanisms, and risk for recurrence in siblings. *Am J Respir Crit Care Med* 2001;164(3):346-57.
8. Dales R, Burnett RT, Smith-Doiron M, et al. Air pollution and sudden infant death syndrome. *Pediatrics* 2004;113(6):e628-31.

- 1  
2  
3 9. Kaiser R, Romieu I, Medina S, et al. Air pollution attributable postneonatal infant mortality  
4 in U.S. metropolitan areas: a risk assessment study. *Environ Health* 2004;3(1):4.  
5  
6
- 7  
8 10. Heinrich J, Slama R. Fine particles, a major threat to children. *Int J Hyg Environ Health*  
9  
10 2007;210(5):617-22.  
11
- 12 11. Yorifuji T, Kashima S, [Doi H](#). Acute exposure to fine and coarse particulate matter and  
13 infant mortality in Tokyo, Japan (2002-2013). [Sci Total Environ](#). 2016 May 1;551-552:66-  
14 72. doi:10.1016/j.scitotenv.2016.01.211. Epub 2016 Feb 11.  
15  
16
- 17 12. Luechinger S [Air pollution and infant mortality: A natural experiment from power plant](#)  
18 [desulfurization](#) *Journal of Health Economics* 37 (2014) 219–231  
19  
20  
21
- 22 13. National Institute of Child Health and Human Development. How many infants die from  
23 SIDS or are at risk for SIDS? 2013.  
24  
25 <https://www.nichd.nih.gov/health/topics/sids/conditioninfo/pages/risk.aspx> (accessed Apr  
26 2017).  
27  
28
- 29 14. Kinney HC, Thach BT. The sudden infant death syndrome. *N Engl J Med*  
30 2009;361(8):795-805.  
31  
32
- 33 15. Goldwater PN Infection: the neglected paradigm in SIDS research *Archives of Disease in*  
34 *Childhood* 2017;102:767-772.  
35  
36
- 37 16. Leach CE, Blair PS, Fleming PJ, et al. Epidemiology of SIDS and explained sudden infant  
38 deaths. CESDI SUDI Research Group. *Pediatrics* 1999;104(4):e43.  
39  
40
- 41 17. Brooke H, Gibson A, Tappin D, et al. Case-control study of sudden infant death syndrome  
42 in Scotland, 1992-5. *BMJ* 1997;314(7093):1516-20.  
43  
44
- 45 18. Douglas AS, Allan TM, Helms PJ. Seasonality and the Sudden Infant Death Syndrome  
46 during 1987-9 and 1991-3 in Australia and Britain. *BMJ* 1996;312(7043):1381-3.  
47  
48  
49  
50  
51  
52  
53  
54  
55  
56  
57  
58  
59  
60



19. Glinianaia SV, Rankin J, Bell R, et al. Does particulate air pollution contribute to infant death? A systematic review. *Environ Health Perspect* 2004;112(14):1365-70.
20. Tong S, Colditz P. Air pollution and sudden infant death syndrome: a literature review. *Paediatr Perinat Epidemiol* 2004;18(5):327-35.
21. "2014 UK Population Estimates". ONS. Retrieved 27 July 2015
22. National Centre for Atmospheric Science, Natural Environment Research Council. British Atmospheric Data Centre. [http://badc.nerc.ac.uk/home/index\\_beacon.html](http://badc.nerc.ac.uk/home/index_beacon.html) (accessed Apr 2017).
23. Pope A. "Indices of Deprivation England and Wales 2010" [ESRI Shapefile geospatial data]. 2013. <https://www.sharegeo.ac.uk/handle/10672/481> (accessed Dec 2016).
24. Maclure M. The case-crossover design: a method for studying transient effects on the risk of acute events. *Am J Epidemiol* 1991;133(2):144-53.
25. Lee JT, Schwartz J. Reanalysis of the effects of air pollution on daily mortality in Seoul, Korea: A case-crossover design. *Environ Health Perspect* 1999;107(8):633-6.
26. Jaakkola JJ. Case-crossover design in air pollution epidemiology. *Eur Respir J Suppl* 2003;40:81s-5s.
27. Pope CA 3rd, Muhlestein JB, May HT, et al. Ischemic heart disease events triggered by short-term exposure to fine particulate air pollution. *Circulation* 2006;114(23):2443-8.
28. Bhaskaran K, Hajat S, Armstrong B, et al. The effects of hourly differences in air pollution on the risk of myocardial infarction: case crossover analysis of the MINAP database. *BMJ* 2011;343:d5531.
29. Janes H, Sheppard L, Lumley T. Case-crossover analyses of air pollution exposure data: referent selection strategies and their implications for bias. *Epidemiology* 2005;16:717-26

- 1
- 2
- 3 30. Breslow NE, Day NE. Statistical methods in cancer research. Volume I - The analysis of
- 4 case-control studies. IARC Sci Publ 1980;32:5-338.
- 5
- 6
- 7 31. Armstrong BG, Gasparrini A, Tobias A. Conditional Poisson models: a flexible alternative
- 8 to conditional logistic case cross-over analysis. BMC Med Res Methodol 2014;14:122.
- 9
- 10 32. Le Tertre A, Medina S, Samoli E, et al. Short-term effects of particulate air pollution on
- 11 cardiovascular diseases in eight European cities. J Epidemiol Community Health
- 12 2002;56(10):773-9.
- 13
- 14 33. Katsouyanni K, Samet JM, Anderson HR, et al. Air pollution and health: a European and
- 15 North American approach (APHENA). Res Rep Health Eff Inst 2009;142:5-90.
- 16
- 17 34. Scheers H, Mwalili SM, Faes C, et al. Does air pollution trigger infant mortality in Western
- 18 Europe? A case-crossover study. Environ Health Perspect 2011;119(7):1017-22.
- 19
- 20 35. Braga AL, Zanobetti A, Schwartz J. The effect of weather on respiratory and
- 21 cardiovascular deaths in 12 U.S. cities. Environ Health Perspect 2002;110(9):859-63.
- 22
- 23 36. Armstrong B. Models for the relationship between ambient temperature and daily
- 24 mortality. Epidemiology 2006;17(6):624-31.
- 25
- 26 37. R Core Team. R: A Language and Environment for Statistical Computing. 2013.
- 27 <http://www.R-project.org> (accessed Apr 2017).
- 28
- 29 38. <https://uk-air.defra.gov.uk/air-pollution/uk-eu-limits> (accessed Dec 2017).
- 30
- 31 39. R Core Team. R: A Language and Environment for Statistical Computing. 2013.
- 32 <http://www.R-project.org> (accessed Apr 2017).
- 33
- 34 40. Ritz B, Wilhelm M, Zhao Y. Air pollution and infant death in southern California, 1989-
- 35 2000. Pediatrics 2006;118(2):493-502.
- 36
- 37
- 38
- 39
- 40
- 41
- 42
- 43
- 44
- 45
- 46
- 47
- 48
- 49
- 50
- 51
- 52
- 53
- 54
- 55
- 56
- 57
- 58
- 59
- 60

- 1  
2  
3 41. Woodruff TJ, Darrow LA, Parker JD. Air pollution and postneonatal infant mortality in the  
4  
5 United States, 1999-2002. *Environ Health Perspect* 2008;116(1):110-5.  
6  
7
- 8 42. Pope CA, Dockery DW Health Effects of Fine Particulate Air Pollution: Lines that  
9 Connect *Journal of the Air & Waste Management Association* 2006; 56 (6)  
10  
11
- 12 43. Lancet commission on air quality and health Published online October 19, 2017  
13  
14 [http://dx.doi.org/10.1016/S0140-6736\(17\)32345-0](http://dx.doi.org/10.1016/S0140-6736(17)32345-0) (Accessed November 2017)  
15  
16
- 17 44. Rice MB, Ljungman PL, Wilker EH, et al. Short-term exposure to air pollution and lung  
18 function in the Framingham Heart Study. *Am J Respir Crit Care Med* 2013; 188 (11):  
19 1351- 357.  
20  
21
- 22 45. Samoli E, Stafoggia M, Rodopoulou S, et al. Associations between fine and coarse  
23 particles and mortality in Mediterranean cities: results from the MED-PARTICLES  
24 project. *Environ Health Perspect* 2013; 121 (8):932–938  
25  
26  
27  
28  
29
- 30 46. Scheers H, Mwalili SM, Faes C, Fierens F, Nemery B, and Nawrot TS. Does Air Pollution  
31 Trigger Infant Mortality in Western Europe? A Case-Crossover Study *Environ Health*  
32 *Perspect* 2011; 119:1017–1022  
33  
34  
35  
36
- 37 47. Woodruff TJ, Parker JD, Schoendorf KC. Fine Particulate Matter (PM(2.5)) Air Pollution  
38 and Selected Causes of Postneonatal Infant Mortality in California. *Environ Health*  
39 *Perspect* 2006;114(5):786-90.  
40  
41  
42  
43
- 44 48. Schwartz J The distributed lag between air pollution and daily deaths *Epidemiology*. 2000  
45 May;11(3):320-6  
46  
47
- 48 49. Association Between Short-Term Exposure to PM2.5 and PM10 and Mortality in  
49 Susceptible Subgroups: A Multisite Case-Crossover Analysis of Individual Effect  
50  
51  
52  
53  
54  
55  
56  
57  
58  
59  
60

- 1  
2  
3 Biagio K, Gherardi B, Giannini S, Lauriola P American Journal of Epidemiology, Volume  
4 184, Issue 10, 15 November 2016, Pages 744–754  
5  
6  
7  
8 50. Braga AL, Zanobetti A, Schwartz J. The lag structure between particulate air pollution and  
9 respiratory and cardiovascular deaths in 10 US cities. *J Occup Environ Med.* 2001  
10 Nov;43(11):927-33  
11  
12  
13  
14 51. Gold DR, Litonjua A, Schwartz J, et al. Ambient pollution and heart rate variability.  
15 *Circulation.* 2000; 101: 1267–1273  
16  
17  
18  
19 52. Blackwell C, Moscovis S, Hall S, et al. Exploring the risk factors for sudden infant deaths  
20 and their role in inflammatory responses to infection. *Front Immunol.* 2015;6:44.  
21  
22  
23  
24 53. Sarnat J, Schwartz J, Suh H. Comment on: Fine particulate air pollution and mortality in 20  
25 U.S. cities. *N Engl J Med* 2001;344(16):1253-4  
26  
27  
28  
29 54. WHO (2014) “Burden of Disease from Ambient Air Pollution for 2012.” n.d.  
30  
31 [14.pdf](http://www.who.int/phe/health_topics/outdoorair/databases/AAP_BoD_results_March2014.pdf)  
32  
33  
34  
35 55. Lelieveld, J., J. S. Evans, M. Fnais, D. Giannadaki, and A. Pozzer. 2015. “The  
36 Contribution of Outdoor Air Pollution Sources to Premature Mortality on a Global Scale.”  
37 *Nature* 525 (7569). nature.com: 367–71  
38  
39  
40  
41  
42 56. Jackson R, Le Quere C, Andrew RM, Canadell JG, Peters GP, Roy J, Wu L *Environ. Res.*  
43 *Lett.* 12 (2017) 110202  
44  
45  
46  
47 57. [http://www.independent.co.uk/news/world/americas/donald-trump-coal-mining-jobs-](http://www.independent.co.uk/news/world/americas/donald-trump-coal-mining-jobs-promise-experts-disagree-executive-order-a7656486.html)  
48 [promise-experts-disagree-executive-order-a7656486.html](http://www.independent.co.uk/news/world/americas/donald-trump-coal-mining-jobs-promise-experts-disagree-executive-order-a7656486.html) (accessed November 2017)  
49  
50  
51 58. <https://www.eia.gov/tools/faqs/faq.php?id=847&t=6> (accessed November 2017)  
52  
53  
54  
55  
56  
57  
58  
59  
60

- 1  
2  
3 59. [https://www.theguardian.com/politics/2017/jul/25/britain-to-ban-sale-of-all-diesel-and-](https://www.theguardian.com/politics/2017/jul/25/britain-to-ban-sale-of-all-diesel-and-petrol-cars-and-vans-from-2040)  
4 [petrol-cars-and-vans-from-2040](https://www.theguardian.com/politics/2017/jul/25/britain-to-ban-sale-of-all-diesel-and-petrol-cars-and-vans-from-2040) (accessed November 2017)  
5  
6  
7  
8 60. Rich DQ, Kipen HM, Huang W, et al. Association between changes in air pollution levels  
9 during the Beijing Olympics and biomarkers of inflammation and thrombosis in healthy  
10 young adults. *JAMA* 2012;307:2068-78  
11  
12  
13  
14 61. Wright RJ, Brunst KJ. Programming of respiratory health in childhood: influence of  
15 outdoor air pollution. *Curr Opin Pediatr* 2013;25:232-9.  
16  
17  
18  
19 62. Plaia A, Ruggieri M: Air quality indices: a review. *Rev Environ Sci Bio* 2011;10:165-79  
20  
21  
22 63. David L. MacIntosh , Theodore A. Myatt , Jerry F. Ludwig , Brian J. Baker , Helen H. Suh  
23 & John D. Spengler (2008) Whole House Particle Removal and Clean Air Delivery Rates  
24 for In-Duct and Portable Ventilation Systems, *Journal of the Air & Waste Management*  
25 *Association*, 58:11, 1474-1482  
26  
27  
28  
29  
30  
31 64. Laumbach R, Meng Q, Kipen H. What can individuals do to reduce personal health risks  
32 from air pollution? *J Thorac Dis* 2015;7(1):96-107. doi: 10.3978/j.issn.2072-  
33 1439.2014.12.2  
34  
35  
36  
37  
38  
39  
40  
41  
42  
43

## 44 **FIGURE LEGENDS**

45  
46  
47  
48  
49 **Fig. 1** Air pollution monitoring sites with road networks (motorways and A-roads) and SIDS events in the  
50 study area. We used ArcGIS Desktop 10.2 (<http://www.esri.com/software/arcgis>) to create the map  
51 combining shapefiles for postcode areas and motorways and overlaying air pollution and SIDS data.  
52  
53  
54  
55  
56  
57  
58  
59

1  
2  
3 **Fig. 2** Estimated risk of SIDS for an IQR increase in lag 1 pollutant concentration before and after  
4  
5 controlling for confounding by average temperature and national holidays  
6  
7

8  
9 **Fig. 3** Risk of SIDS associated with an IQR increase in pollution for selected lags and average of lags;  
10  
11 models adjusted for average temperature and national holidays  
12  
13

14  
15 **Fig. 4** Risk of SIDS associated with an IQR increase in air pollution after controlling for co-pollutants,  
16  
17 average temperature and national holidays(panel titles indicate: main and co-pollutant respectively)  
18  
19  
20  
21  
22  
23  
24  
25  
26  
27  
28  
29  
30  
31  
32  
33  
34  
35  
36  
37  
38  
39  
40  
41  
42  
43  
44  
45  
46  
47  
48  
49  
50  
51  
52  
53  
54  
55  
56  
57  
58  
59  
60

1  
2  
3  
4  
5  
6  
7  
8  
9  
10  
11  
12  
13  
14  
15  
16  
17  
18  
19  
20  
21  
22  
23  
24  
25  
26  
27  
28  
29  
30  
31  
32  
33  
34  
35  
36  
37  
38  
39  
40  
41  
42  
43  
44  
45  
46  
47  
48  
49  
50  
51  
52  
53  
54  
55  
56  
57  
58  
59  
60

For peer review only

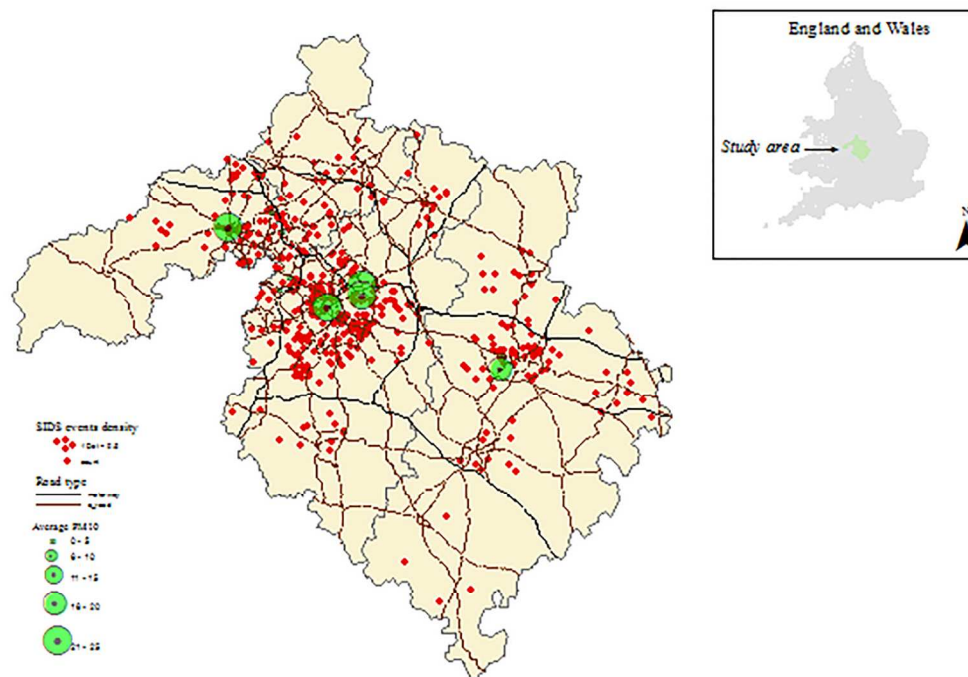

Fig. 1 Air pollution monitoring sites with road networks (motorways and A-roads) and SIDS events in the study area. We used ArcGIS Desktop 10.2 (<http://www.esri.com/software/arcgis>) to create the map combining shapefiles for postcode areas and motorways and overlaying air pollution and SIDS data.

152x105mm (300 x 300 DPI)



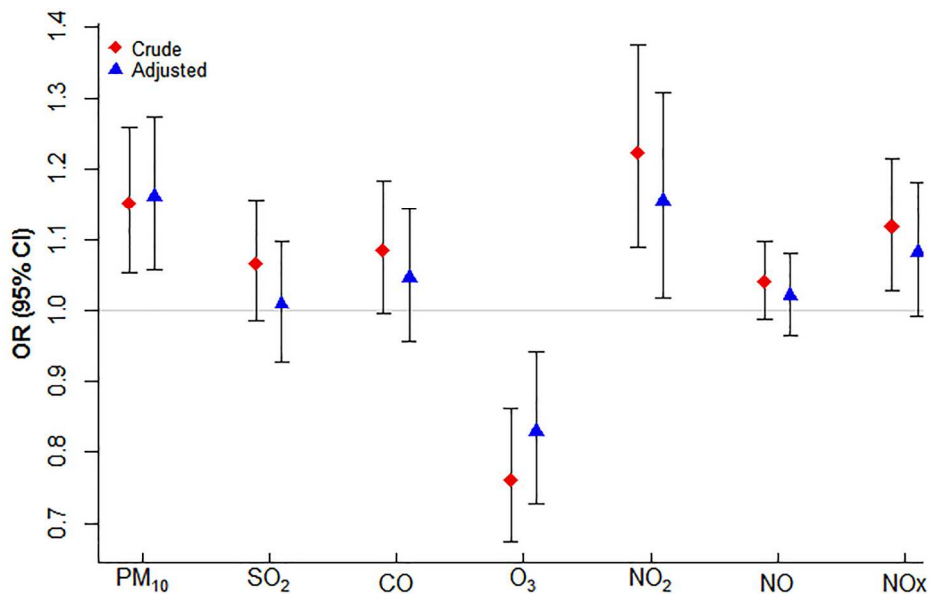

Fig. 2 Estimated risk of SIDS for an IQR increase in lag 1 pollutant concentration before and after controlling for confounding by average temperature and national holidays

179x143mm (300 x 300 DPI)

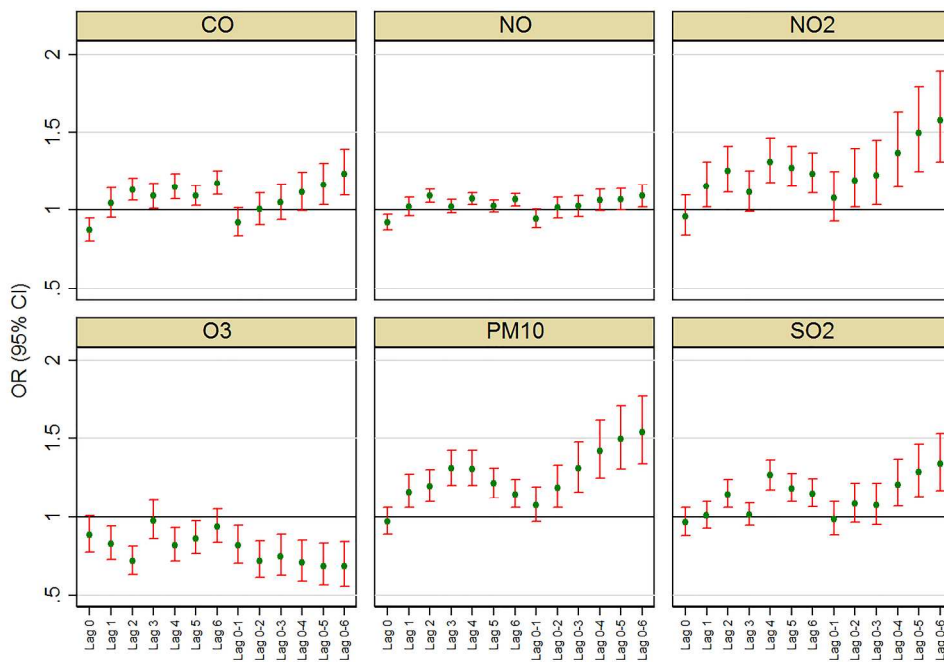

Fig. 3 Risk of SIDS associated with an IQR increase in pollution for selected lags and average of lags; models adjusted for average temperature and national holidays

475x346mm (300 x 300 DPI)

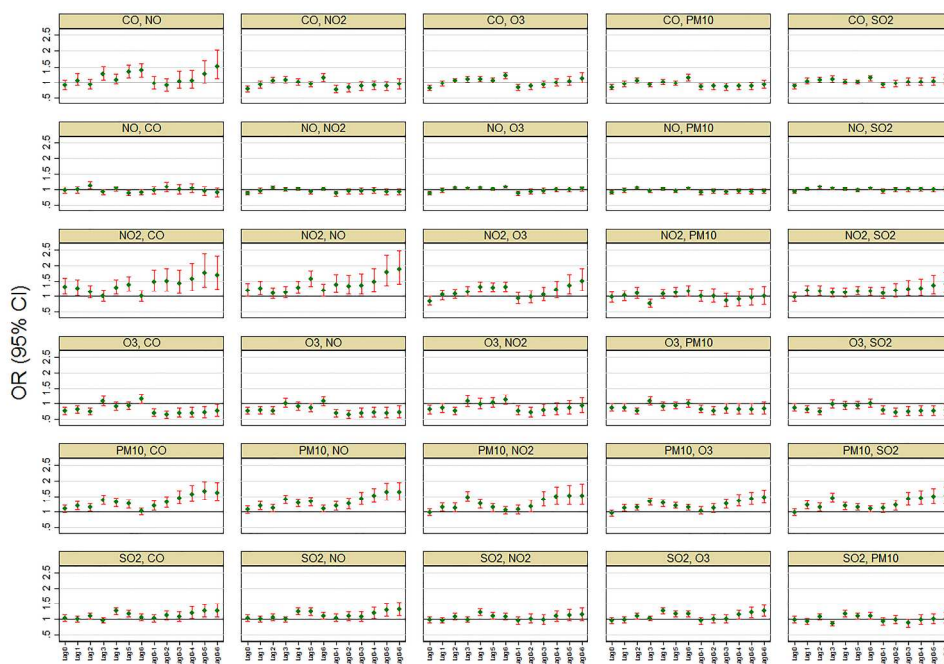

Fig. 4 Risk of SIDS associated with an IQR increase in air pollution after controlling for co-pollutants, average temperature and national holidays(panel titles indicate: main and co-pollutant respectively)

475x346mm (300 x 300 DPI)

1  
2  
3  
4  
5  
6  
7  
8  
9  
10  
11  
12  
13  
14  
15  
16  
17  
18  
19  
20  
21  
22  
23  
24  
25  
26  
27  
28  
29  
30  
31  
32  
33  
34  
35  
36  
37  
38  
39  
40  
41  
42  
43  
44  
45  
46  
47  
48  
49  
50  
51  
52  
53  
54  
55  
56  
57  
58  
59  
60



152x114mm (300 x 300 DPI)

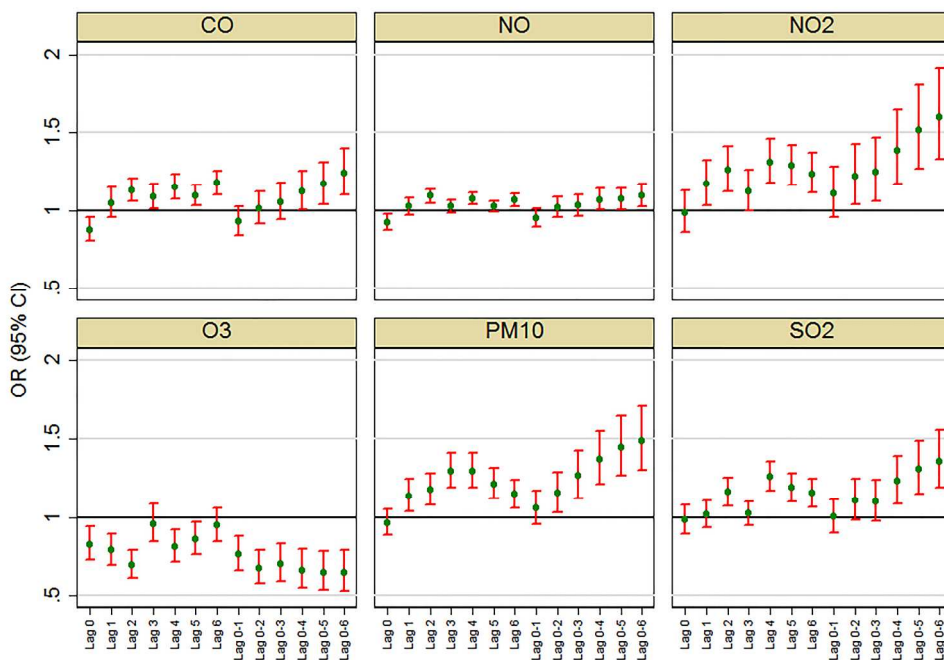

327x238mm (300 x 300 DPI)

STROBE (STrengthening the Reporting of OBServational studies in Epidemiology) Checklist for authors of CORR

This table is modified from and used with the permission of The STROBE Initiative, [www.strobe-statement.org](http://www.strobe-statement.org).

|                           | Item No | Recommendation                                                                                                                                                                             | Please insert check where included or N/A where not applicable |
|---------------------------|---------|--------------------------------------------------------------------------------------------------------------------------------------------------------------------------------------------|----------------------------------------------------------------|
| <b>Title and abstract</b> | 1       | (a) Indicate the study's design with a commonly used term in the title or the abstract                                                                                                     | √                                                              |
|                           |         | (b) Provide in the abstract an informative and balanced summary of what was done and what was found                                                                                        | √                                                              |
| <b>Introduction</b>       |         |                                                                                                                                                                                            |                                                                |
| Background/rationale      | 2       | Explain the scientific background and rationale for the investigation being reported                                                                                                       | Page 4                                                         |
| Objectives                | 3       | State specific objectives, including any prespecified hypotheses                                                                                                                           | Page 8                                                         |
| <b>Methods</b>            |         |                                                                                                                                                                                            |                                                                |
| Study design              | 4       | Present key elements of study design early in the paper                                                                                                                                    | Page 8/9                                                       |
| Setting                   | 5       | Describe the setting, locations, and relevant dates, including periods of recruitment, treatment, follow-up, and data collection                                                           | Tbc                                                            |
| Participants              | 6       | (a) <i>Cohort study</i> —Give the eligibility criteria, and the sources and methods of selection of participants. Describe methods of follow-up                                            | Page 6                                                         |
|                           |         | <i>Case-control study</i> —Give the eligibility criteria, and the sources and methods of case ascertainment and control selection. Give the rationale for the choice of cases and controls |                                                                |
|                           |         | <i>Cross-sectional study</i> —Give the eligibility criteria, and the sources and methods of selection of participants                                                                      |                                                                |
|                           |         | (b) <i>Cohort study</i> —For matched studies, give matching criteria and number of treated and untreated                                                                                   | Page 9                                                         |
|                           |         | <i>Case-control study</i> —For matched studies, give matching criteria and the number of controls per case                                                                                 |                                                                |

|                              |     |                                                                                                                                                                                                                                                                                                                                                                                                                                                                                                                                                                   |                                    |
|------------------------------|-----|-------------------------------------------------------------------------------------------------------------------------------------------------------------------------------------------------------------------------------------------------------------------------------------------------------------------------------------------------------------------------------------------------------------------------------------------------------------------------------------------------------------------------------------------------------------------|------------------------------------|
| Participants                 | 13* | (a) Report numbers of individuals at each stage of study—eg numbers potentially eligible, examined for eligibility, confirmed eligible, included in the study, completing follow-up, and analysed<br>(b) Give reasons for non-participation at each stage                                                                                                                                                                                                                                                                                                         | (page 11 –descriptive statistics)  |
| Descriptive data             | 14* | (a) Give characteristics of study participants (eg demographic, clinical, social) and information on other treatments and potential confounders<br>(b) Indicate number of participants with missing data for each variable of interest<br>(c) <i>Cohort study</i> —Summarise follow-up time (eg, average and total amount)                                                                                                                                                                                                                                        | (Table 2)<br>n/a                   |
| Variables                    | 7   | Clearly define all outcomes, treatments, predictors, potential confounders, and effect modifiers. Give diagnostic criteria, if applicable                                                                                                                                                                                                                                                                                                                                                                                                                         | Table 2 and 3                      |
| Data sources/<br>measurement | 8   | For each variable of interest, give sources of data and details of methods of assessment (measurement). Describe comparability of assessment methods if there is more than one group                                                                                                                                                                                                                                                                                                                                                                              | Page 6 and Page 8                  |
| Bias                         | 9   | Describe any efforts to address potential sources of bias                                                                                                                                                                                                                                                                                                                                                                                                                                                                                                         | Page 9                             |
| Study size                   | 10  | Explain how the study size was arrived at                                                                                                                                                                                                                                                                                                                                                                                                                                                                                                                         | Page 6 – Data on SIDS mortality    |
| Quantitative variables       | 11  | Explain how quantitative variables were handled in the analyses. If applicable, describe which groupings were chosen and why                                                                                                                                                                                                                                                                                                                                                                                                                                      | Page 9                             |
| Statistical methods          | 12  | (a) Describe all statistical methods, including those used to control for confounding<br>(b) Describe any methods used to examine subgroups and interactions<br>(c) Explain how missing data were addressed<br>(d) <i>Cohort study</i> —If applicable, explain how loss to follow-up was addressed<br><i>Case-control study</i> —If applicable, explain how matching of cases and controls was addressed<br><i>Cross-sectional study</i> —If applicable, describe analytical methods taking account of sampling strategy<br>(e) Describe any sensitivity analyses | Page 8/9<br>n/a<br>n/a<br>Page 8/9 |

# BMJ Open

## Is Ambient Air Pollution associated with onset of Sudden Infant Death Syndrome: A case crossover study in the UK

|                                 |                                                                                                                                                                                                                                                                                                                                                    |
|---------------------------------|----------------------------------------------------------------------------------------------------------------------------------------------------------------------------------------------------------------------------------------------------------------------------------------------------------------------------------------------------|
| Journal:                        | <i>BMJ Open</i>                                                                                                                                                                                                                                                                                                                                    |
| Manuscript ID                   | bmjopen-2017-018341.R2                                                                                                                                                                                                                                                                                                                             |
| Article Type:                   | Research                                                                                                                                                                                                                                                                                                                                           |
| Date Submitted by the Author:   | 02-Feb-2018                                                                                                                                                                                                                                                                                                                                        |
| Complete List of Authors:       | Litchfield, Ian; University of Birmingham, Institute of Applied Health Research<br>Ayes, Jon; University of Birmingham, Institute of Applied Health Research<br>Jaakkola, Jouni; University of Oulu, Center for Environmental and Respiratory Health Research<br>Mohammed, Nuredin; University of Birmingham, Institute of Applied Health Research |
| <b>Primary Subject Heading</b>: | Epidemiology                                                                                                                                                                                                                                                                                                                                       |
| Secondary Subject Heading:      | Occupational and environmental medicine, Paediatrics, Public health, Respiratory medicine                                                                                                                                                                                                                                                          |
| Keywords:                       | EPIDEMIOLGY, Community child health < PAEDIATRICS, Cot death < PAEDIATRICS, Paediatric thoracic medicine < PAEDIATRICS, PUBLIC HEALTH                                                                                                                                                                                                              |
|                                 |                                                                                                                                                                                                                                                                                                                                                    |

SCHOLARONE™  
Manuscripts

only



# Is Ambient Air Pollution associated with onset of Sudden Infant Death Syndrome: A case crossover study in the UK

Ian J Litchfield<sup>1\*</sup>, Jon G Ayres<sup>1</sup>, Jouni J K Jaakkola<sup>2</sup>, and Nuredin I Mohammed<sup>1,3</sup>

## Affiliations

1 Institute of Applied Health Research, College of Medical and Dental Sciences  
University of Birmingham  
Edgbaston, Birmingham, B15 2TT  
United Kingdom

2 Center for Environmental and Respiratory Health Research  
Faculty of Medicine  
POB 5000 (Aapistie 5B)  
90014 Oulu, Finland

3 Medical Research Council Unit The Gambia  
Atlantic Road  
PO Box 273, Banjul  
The Gambia

## \*Corresponding Author

Dr Ian J Litchfield

Address: Institute of Applied Health Research, College of Medical and Dental Sciences  
University of Birmingham  
Edgbaston, Birmingham, B15 2TT  
United Kingdom

Email: [i.litchfield@bham.ac.uk](mailto:i.litchfield@bham.ac.uk)

Telephone: +44 0121 414 6006

Fax: +44 0121 414 6217

1  
2  
3  
4  
5 Word count: 3024

6 Number of figures: 4

7  
8 Number of tables: 4  
9  
10  
11  
12  
13  
14  
15  
16  
17  
18  
19  
20  
21  
22  
23  
24  
25  
26  
27  
28  
29  
30  
31  
32  
33  
34  
35  
36  
37  
38  
39  
40  
41  
42  
43  
44  
45  
46  
47  
48  
49  
50  
51  
52  
53  
54  
55  
56  
57  
58  
59  
60

For peer review only

## ABSTRACT

**Objectives:** Air pollution has been associated with increased mortality and morbidity in several studies with indications its effect could be more severe in children. This study examined the relationship between short-term variations in criteria air pollutants and occurrence of sudden infant death syndrome (SIDS).

**Design:** We used a case-crossover study design which is widely applied in air pollution studies and particularly useful for estimating the risk of a rare acute outcome associated with short-term exposure.

**Setting:** The study used data from the West Midlands region in the UK.

**Participants:** We obtained daily time series data on SIDS mortality (ICD-9: 798.0 or ICD-10: R95) for the period 1996-2006 with a total of 211 SIDS events.

**Primary outcome measures:** Daily counts of SIDS events.

**Results:** For an interquartile range increase in previous day pollutant concentration, the percentage increases (95% confidence interval) in SIDS were 16 (6, 27) for PM<sub>10</sub>, 1 (-7, 10) for SO<sub>2</sub>, 5 (-4, 14) for CO, -17 (-27, -6) for O<sub>3</sub>, 16 (2, 31) for NO<sub>2</sub>, and 2 (-3, 8) for NO after controlling for average temperature and national holidays. PM<sub>10</sub> and NO<sub>2</sub> showed relatively consistent association which persisted across different lag structures and after adjusting for co-pollutants.

**Conclusions:** The results indicated ambient air pollutants, particularly PM<sub>10</sub> and NO<sub>2</sub>, may show an association with increased SIDS mortality. Thus, future studies are recommended to understand possible mechanistic explanations on the role of air pollution on SIDS incidence and the ways in which we might reduce pollution exposure among infants.

1  
2  
3 **Clinical trial registration:** Not applicable.  
4  
5  
6

7 **Keywords:** Air pollution; Child health; Time-series; Infant mortality.  
8  
9  
10

## 11 **Article Summary**

### 12 **Strengths and limitations of this study**

- 13 • Sudden infant death is the leading cause of death in healthy infants between one  
14 month and one year olds and our study is the first based on time series data from the  
15 UK to investigate the relationship between common air pollutants and SIDS.  
16
- 17 • Though our study is limited in power due to the comparatively small number of daily  
18 SIDS events our chosen design is widely applied in air pollution studies and  
19 particularly useful for estimating the risk of a rare acute outcome associated with  
20 short-term exposure.  
21  
22  
23  
24  
25  
26  
27  
28  
29  
30  
31  
32  
33  
34  
35  
36  
37  
38  
39  
40  
41  
42  
43  
44  
45  
46  
47  
48  
49

## 50 **INTRODUCTION**

51 The quality of ambient air is an important factor in the health of adults and children.  
52

53 Ambient air quality is the second largest challenge facing public health in the UK.[1] According  
54  
55  
56  
57  
58  
59  
60

1  
2  
3 to the World Health Organisation (WHO), over 3.7 million premature deaths per annum may be  
4 attributed to the harmful effects of ambient air. Children it would seem are more vulnerable than  
5 any other group[2] and recent studies have indicated how even low-levels of traffic-related air  
6 pollution can have a negative impact on birth outcomes and perinatal health.[3, 4] A number of  
7 studies have also suggested a link between ambient air quality and the incidence of sudden infant  
8 death syndrome (SIDS).[5-12] Here we examine the effects of the short term variations in air  
9 pollution and the onset of SIDS.  
10  
11  
12  
13  
14  
15  
16  
17  
18  
19  
20

21 Sudden infant death is the leading cause of death in healthy infants between one month and  
22 one year old,[13] and the impact on the families is notably traumatic as the death is without  
23 warning or witness.[14] The exact cause continues to tax researchers [15] though is likely the  
24 result of a combination of factors including susceptibility and environmental stressors such as  
25 lower social status of parents,[16] environmental tobacco smoke,[16, 17] the prone position[18]  
26 and the winter season.[5, 18] The impact of tobacco smoke suggests a respiratory trigger may be  
27 involved, however the evidence of an association between SIDS and air pollution warrant further  
28 research as findings from epidemiological studies have been inconsistent.[19, 20] and few have  
29 satisfactorily explored the impact of short-term exposure on SIDS. Our study is the first based on  
30 time series data from the UK to investigate the relationship between common air pollutants and  
31 SIDS. We have collated data from a ten-year period on concentrations of air pollution and onset  
32 of SIDS within the West Midlands one of the largest and most polluted conurbations in the UK  
33 and have conducted a case-crossover study to determine any associations.  
34  
35  
36  
37  
38  
39  
40  
41  
42  
43  
44  
45  
46  
47  
48  
49  
50  
51  
52  
53  
54  
55  
56  
57  
58  
59  
60

## METHODS

### Settings

The West Midlands is a metropolitan county in the centre of the UK. It has a population of some 2.8 million. [21] The West Midlands is one of the most heavily urbanized counties in the UK and forms the most populated conurbation in the UK outside London, It is at the heart of the UK motorway network and remains a significant centre of the UK's manufacturing industry.

### Data collection

We combined data on SIDS events with data on total births, air pollution, air temperature and a measure of deprivation.

#### Data on SIDS mortality and total births

We obtained daily time series data on SIDS mortality (ICD-9: 798.0 or ICD-10: R95) for the period 1996-2006 from the Perinatal Institute (PI). All cases were between 0 and 12 months old at onset. This data consisted of the date of death and the first three digits of the postcode to avoid the possibility of identifying individual cases due to the rare nature of SIDS. This allowed us to explore the effects of short-term exposure. We obtained daily births data with West Midlands' postcodes from the Office of National Statistics (ONS) for the period 1996-2006 and was used for descriptive analysis only.

## Air pollution data

The daily time series data on air pollution were compiled from the UK air quality archive managed by Department for the Environment, Food and Rural Affairs (DEFRA). These include a total of ten monitoring stations in the West Midlands measuring PM<sub>10</sub>, SO<sub>2</sub>, NO<sub>2</sub>, NO, NO<sub>x</sub>, CO and O<sub>3</sub> including sites within Birmingham, Coventry, Walsall and Wolverhampton. Before 1996 the reliability of air quality data was inconsistent. Not all monitoring stations had measurements for the range of pollutants over the entire study period and the precise pollutants measured at each monitoring centre are described in Table 1.

*Table 1: Pollutants measured and corresponding time period by monitoring stations*

| Name (postcode area)      | Pollutants                                                                                     | Time period <sup>a</sup> |
|---------------------------|------------------------------------------------------------------------------------------------|--------------------------|
| Birmingham Centre (B)     | PM <sub>10</sub> , SO <sub>2</sub> , NO <sub>2</sub> ,NO, NO <sub>x</sub> , CO, O <sub>3</sub> | 01/01/1996-31/12/2006    |
| Birmingham East (B)       | PM <sub>10</sub> , SO <sub>2</sub> , NO <sub>2</sub> ,NO, CO, O <sub>3</sub>                   | 01/01/1996-03/08/2004    |
| Birmingham Tyburn (B)     | PM <sub>10</sub> , SO <sub>2</sub> , NO <sub>2</sub> ,NO, CO, O <sub>3</sub>                   | 16/08/2004-31/12/2006    |
| Oldbury (B)               | PM <sub>10</sub> , SO <sub>2</sub> , NO <sub>2</sub> ,NO, NO <sub>x</sub> , CO, O <sub>3</sub> | 27/06/1997-20/09/1998    |
| West Bromwich (B)         | PM <sub>10</sub> , SO <sub>2</sub> , NO <sub>2</sub> ,NO, NO <sub>x</sub> , CO, O <sub>3</sub> | 04/11/1998-31/12/2006    |
| Coventry Centre (CV)      | PM <sub>10</sub> , SO <sub>2</sub> , NO <sub>2</sub> ,NO, NO <sub>x</sub> , CO, O <sub>3</sub> | 19/02/1997-31/12/2006    |
| Coventry Memorial (CV)    | PM <sub>10</sub> , SO <sub>2</sub> , NO <sub>2</sub> ,NO, NO <sub>x</sub> , CO, O <sub>3</sub> | 26/02/2001-31/12/2006    |
| Walsall Alumwell (WS)     | NO <sub>2</sub> , NO <sub>x</sub>                                                              | 01/01/1996-31/12/2006    |
| Walsall Willenhall (WS)   | NO <sub>2</sub>                                                                                | 13/05/1997-31/12/2006    |
| Wolverhampton Centre (WV) | PM <sub>10</sub> , SO <sub>2</sub> , NO <sub>2</sub> ,NO, NO <sub>x</sub> , CO, O <sub>3</sub> | 19/12/1995-31/12/2006    |

<sup>a</sup>Period with at least one pollutant being measured and taking into account missing data between start and end dates.

1  
2  
3 We aimed to examine the association between day-to-day variability in air pollution  
4 exposure and SIDS counts over the entire region rather than contrasting exposure and outcome  
5 between areas within the West Midlands region. Therefore the daily pollution data for West  
6 Midlands were calculated by averaging across all monitoring stations with available  
7 measurements as our models were based on the temporal relationship between air pollution and  
8 SIDS; we did not fit a spatial model.  
9  
10  
11  
12  
13  
14  
15  
16  
17  
18

#### 19 Temperature data

20  
21 Data on daily minimum and maximum temperature were compiled for weather monitoring  
22 stations in the West Midlands from the Meteorological Office British Atmospheric Data Centre  
23 (BADC).[22] We used the average daily temperature which was calculated by taking the average  
24 of the minimum and maximum temperature at each monitoring station for each day to obtain the  
25 daily average temperature for the entire West Midlands.  
26  
27  
28  
29  
30  
31  
32  
33  
34

#### 35 Index of multiple deprivation (IMD) score

36  
37 The IMD score is a composite measure based on seven dimensions of deprivation  
38 including income deprivation, employment deprivation, health deprivation and disability,  
39 education deprivation, crime deprivation, barriers to housing and services deprivation and living  
40 environment deprivation. The data for the 2010 IMD at postcode level were downloaded from  
41 EDINA Digimap ShareGeo facility, an online spatial data repository and was used for  
42 descriptive analysis only.[23]  
43  
44  
45  
46  
47  
48  
49  
50  
51  
52  
53  
54  
55  
56  
57  
58  
59  
60



## Statistical analysis

The case-crossover design was used to investigate the association between short-term exposure to air pollution and the occurrence of SIDS events controlling for average daily temperature and national holidays. This design, introduced by Maclure,[20] has been widely applied in air pollution studies and is particularly useful for estimating the risk of a rare acute outcome associated with short-term exposure.[24-27] In case-crossover design each case acts as their own control and like case-control studies[28] the distribution of exposure is compared between ‘cases’ and ‘controls’. That is, exposure at the time just prior to the event (‘case’ or ‘index’ time) is compared with a set of ‘control’ times that represent the expected distribution of exposure for non-event follow-up times. The design helps primarily to control for confounding by subject-specific factors which remain static over time such as ethnicity and gender.

We applied the time stratified case-crossover approach which has previously been used to minimise bias. [29] That is, control days were selected from the same day of the week, within the same calendar month and year as the event day. We applied a conditional Poisson regression model which has been shown to give equivalent estimates as the conditional logistic model but with the advantage of readily allowing for overdispersion and autocorrelation.[30] All our models assume a linear effect for air pollution as reported in previous studies[31 -33] while temperature effects are likely to be non-linear and were modelled using natural splines with 3 degrees of freedom.[34-36]

## Sensitivity analyses

1  
2  
3 The primary aim was to investigate the risk of SIDS events in relation to air pollution on  
4 the previous day in single pollutant models. To examine sensitivities to our *a priori* model  
5 specification, additional lag structures were explored including single lags of 0,1,2,...,6 days and  
6 also the corresponding average of lags 0-1, 0-2, 0-3,..., 0-6. Moreover, the association between  
7 SIDS and air pollution was examined after adjusting for the effect of each of the pollutants PM<sub>10</sub>,  
8 SO<sub>2</sub>, NO<sub>2</sub>, NO, CO and O<sub>3</sub> as a second pollutant in turn. The aim of this two-pollutant modelling  
9 approach was to account for potential confounding effect of co-pollutants. Further sensitivity  
10 analyses were performed by controlling for minimum temperature instead of the average  
11 temperature. We excluded NO<sub>x</sub> from the sensitivity analyses as it showed very strong correlation  
12 particularly with NO (r=0.96).  
13  
14  
15  
16  
17  
18  
19  
20  
21  
22  
23  
24  
25  
26  
27

28 Results are presented as percentage increases in mortality with 95% confidence intervals  
29 (CIs) for an interquartile range (IQR) increase in pollutant concentration. Hypothesis tests were  
30 two-sided with a significance level of 0.05. All analyses were performed using the R statistical  
31 software; details of the packages used and sample line of code for fitting specific conditional  
32 Poisson regression model is given in the supplementary material (See Supplementary  
33 File:S1).[37]  
34  
35  
36  
37  
38  
39  
40  
41  
42  
43  
44

## 45 RESULTS

### 46 Descriptive statistics

47 Over the study period (1996–2006), there were 211 SIDS events across the four postcode  
48 areas (B, CV, WS and WV) included in the analyses which accounted for about approximately  
49  
50  
51  
52  
53  
54  
55  
56  
57  
58  
59  
60

1  
2  
3  
4  
5  
6  
7  
8  
9  
10  
11  
12  
13  
14  
15  
16  
17  
18  
19  
20  
21  
22  
23  
24  
25  
26  
27  
28  
29  
30  
31  
32  
33  
34  
35  
36  
37  
38  
39  
40  
41  
42  
43  
44  
45  
46  
47  
48  
49  
50  
51  
52  
53  
54  
55  
56  
57  
58  
59  
60

5% of the days within the study period (Table 2). In the same period and location, a total of 943,937 live (single) births were registered.

For peer review only

Table 2: Average air pollution ( $\mu\text{gm}^{-3}$ ), temperature ( $^{\circ}\text{C}$ ) and IMD scores for selected West Midlands postcode areas with SIDS and birth counts, 1996-2006

| Post town (area)      | PM <sub>10</sub> | SO <sub>2</sub> | CO  | O <sub>3</sub> | NO <sub>2</sub> | NO   | NO <sub>x</sub> | Temp.<br>(Min-Max) | IMD score | SIDS<br>event (%) | Birth count<br>(%) |
|-----------------------|------------------|-----------------|-----|----------------|-----------------|------|-----------------|--------------------|-----------|-------------------|--------------------|
| Birmingham (B)        | 23.8             | 6.8             | 0.4 | 38.5           | 33.9            | 17.5 | 60              | 7.2-12.8           | 36.6      | 118<br>(55.9)     | 753844<br>(79.9)   |
| Coventry (CV)         | 18.3             | 11.3            | 0.3 | 32.4           | 22.5            | 9.2  | 36.2            | 7.7-13.5           | 23.7      | 43<br>(20.4)      | 91393<br>(9.7)     |
| Walsall (WS)          |                  |                 |     |                | 41.5            |      | 89.4            | 6.4-14.0           | 25.2      | 24<br>(11.4)      | 53532<br>(5.7)     |
| Wolverhampton<br>(WV) | 23.8             | 9.3             | 0.5 | 38.9           | 29.5            | 18.9 | 59.5            | 8.4-12.3           | 33.4      | 26<br>(12.3)      | 45168<br>(4.8)     |
| Total                 |                  |                 |     |                |                 |      |                 |                    |           | 211<br>(100)      | 943937<br>(100)    |

1  
2  
3  
4  
5  
6  
7  
8  
9  
10  
11  
12  
13  
14  
15  
16  
17  
18  
19  
20  
21  
22  
23  
24  
25  
26  
27  
28  
29  
30  
31  
32  
33  
34  
35  
36  
37  
38  
39  
40  
41  
42  
43  
44  
45  
46  
47  
48  
49  
50  
51  
52  
53  
54  
55  
56  
57  
58  
59  
60

The daily average air pollution concentrations and their standard deviations are presented in Table 3 and show that average concentrations tended to be below UK air quality limits as defined by the EU Ambient Air Quality Directive.[38]

Table 3: Descriptive statistics for daily SIDS mortality counts, air pollution ( $\mu\text{g}\text{m}^{-3}$ ), temperature ( $^{\circ}\text{C}$ ) and birth counts for West Midlands, 1996-2006

| Variable                 | Mean | SD   | Median | IQR       | Min  | Max   |
|--------------------------|------|------|--------|-----------|------|-------|
| SIDS count               | <1   | <1   | 0      | 0-0       | 0    | 2     |
| Average temperature      | 10.2 | 5.4  | 10.2   | 6.2-14.5  | -4.2 | 25.0  |
| Max temperature          | 13.1 | 6.0  | 12.9   | 8.5-17.6  | -2.1 | 29.6  |
| Min temperature          | 7.4  | 5.1  | 7.5    | 3.6-11.4  | -7.5 | 20.7  |
| PM <sub>10</sub>         | 23.4 | 11.6 | 20.2   | 15.7-28.2 | 4.0  | 128.9 |
| SO <sub>2</sub>          | 8.5  | 6.9  | 7.2    | 4.4-10.2  | 0.0  | 70.8  |
| CO                       | 0.4  | 0.2  | 0.4    | 0.3-0.5   | 0.1  | 3.5   |
| O <sub>3</sub>           | 38.1 | 18.2 | 38.0   | 25.4-50.4 | 1.3  | 115.8 |
| NO <sub>2</sub>          | 33.2 | 14.3 | 31.2   | 22.3-41.8 | 5.9  | 113.0 |
| NO                       | 16.9 | 23.8 | 9.0    | 5.4-17.9  | 0.4  | 314.9 |
| NO <sub>x</sub>          | 64.5 | 49.3 | 51.1   | 35.2-76.4 | 7.9  | 569.2 |
| Birth count <sup>a</sup> | 290  | 34   | 296    | 266 - 314 | 183  | 387   |
| IMD score                | 32.3 | 12.6 | 31.7   | 21.3-40.5 | 7.2  | 54.9  |

<sup>a</sup> Counts are for single births only

1  
2  
3 Table 4 shows that there was generally a strong correlation between the levels of pollutants  
4 investigated with the exception of the weaker correlation between O<sub>3</sub> and PM<sub>10</sub> (r=-0.26) and  
5 with SO<sub>2</sub> (r=-0.34). What was also notable was the negative correlation between Ozone and the  
6 other pollutants and how in contrast to the other pollutants its positive correlation with  
7 temperature.  
8  
9  
10  
11  
12  
13  
14  
15  
16  
17  
18  
19  
20  
21  
22  
23  
24  
25  
26  
27  
28  
29  
30  
31  
32  
33  
34  
35  
36  
37  
38  
39  
40  
41  
42  
43  
44  
45  
46  
47  
48  
49  
50  
51  
52  
53  
54  
55  
56  
57  
58  
59  
60

1  
2  
3 *Table 4: Pairwise Pearson correlations coefficients (r) for pollutants and*  
4  
5 *temperature*  
6

7

|    | PM <sub>10</sub> | SO <sub>2</sub> | CO    | O <sub>3</sub> | NO <sub>2</sub> | NO    | NO <sub>x</sub> |
|----|------------------|-----------------|-------|----------------|-----------------|-------|-----------------|
| 8  |                  |                 |       |                |                 |       |                 |
| 9  |                  |                 |       |                |                 |       |                 |
| 10 | SO <sub>2</sub>  | 0.53            |       |                |                 |       |                 |
| 11 |                  |                 |       |                |                 |       |                 |
| 12 | CO               | 0.56            | 0.59  |                |                 |       |                 |
| 13 |                  |                 |       |                |                 |       |                 |
| 14 | O <sub>3</sub>   | -0.26           | -0.34 | -0.56          |                 |       |                 |
| 15 |                  |                 |       |                |                 |       |                 |
| 16 | NO <sub>2</sub>  | 0.66            | 0.56  | 0.76           | -0.62           |       |                 |
| 17 |                  |                 |       |                |                 |       |                 |
| 18 | NO               | 0.54            | 0.48  | 0.87           | -0.58           | 0.73  |                 |
| 19 |                  |                 |       |                |                 |       |                 |
| 20 | NO <sub>x</sub>  | 0.59            | 0.56  | 0.90           | -0.62           | 0.86  | 0.96            |
| 21 |                  |                 |       |                |                 |       |                 |
| 22 | Temperature      | -0.08           | -0.24 | -0.39          | 0.40            | -0.40 | -0.38           |
| 23 |                  |                 |       |                |                 |       |                 |
| 24 |                  |                 |       |                |                 |       |                 |
| 25 |                  |                 |       |                |                 |       |                 |
| 26 |                  |                 |       |                |                 |       |                 |
| 27 |                  |                 |       |                |                 |       |                 |
| 28 |                  |                 |       |                |                 |       |                 |
| 29 |                  |                 |       |                |                 |       |                 |
| 30 |                  |                 |       |                |                 |       |                 |
| 31 |                  |                 |       |                |                 |       |                 |
| 32 |                  |                 |       |                |                 |       |                 |
| 33 |                  |                 |       |                |                 |       |                 |
| 34 |                  |                 |       |                |                 |       |                 |
| 35 |                  |                 |       |                |                 |       |                 |
| 36 |                  |                 |       |                |                 |       |                 |
| 37 |                  |                 |       |                |                 |       |                 |
| 38 |                  |                 |       |                |                 |       |                 |
| 39 |                  |                 |       |                |                 |       |                 |
| 40 |                  |                 |       |                |                 |       |                 |
| 41 |                  |                 |       |                |                 |       |                 |
| 42 |                  |                 |       |                |                 |       |                 |
| 43 |                  |                 |       |                |                 |       |                 |
| 44 |                  |                 |       |                |                 |       |                 |
| 45 |                  |                 |       |                |                 |       |                 |
| 46 |                  |                 |       |                |                 |       |                 |
| 47 |                  |                 |       |                |                 |       |                 |
| 48 |                  |                 |       |                |                 |       |                 |
| 49 |                  |                 |       |                |                 |       |                 |
| 50 |                  |                 |       |                |                 |       |                 |
| 51 |                  |                 |       |                |                 |       |                 |
| 52 |                  |                 |       |                |                 |       |                 |
| 53 |                  |                 |       |                |                 |       |                 |
| 54 |                  |                 |       |                |                 |       |                 |
| 55 |                  |                 |       |                |                 |       |                 |
| 56 |                  |                 |       |                |                 |       |                 |
| 57 |                  |                 |       |                |                 |       |                 |
| 58 |                  |                 |       |                |                 |       |                 |
| 59 |                  |                 |       |                |                 |       |                 |
| 60 |                  |                 |       |                |                 |       |                 |



1  
2  
3 Comparing the four postcode areas, Birmingham had the highest SIDS mortality (about  
4 56%) and births rates (about 80%). Air pollution concentrations were more or less similar for  
5 Birmingham and Wolverhampton except slightly lower levels of NO<sub>2</sub> and higher levels of SO<sub>2</sub>  
6 observed for the latter. Coventry had the lowest pollution level with respect to all pollutants  
7 except SO<sub>2</sub>. Walsall had measurements for NO<sub>2</sub> and NO<sub>x</sub> only which were very large compared  
8 to the other postcode areas (Table 2). Similarly, Birmingham and Wolverhampton had higher  
9 average deprivation scores compared to Coventry and Walsall (Table 2). Also, SIDS counts and  
10 pollution levels tended to be larger in highly deprived areas and near motorways and A-road  
11 networks which may be a reflection of population density (Figure 1; see Supplementary File:  
12 Figure S2). There was also indication of seasonal pattern for SIDS occurrence; the highest  
13 proportions of SIDS were observed in January and February (about 10%) and among the  
14 relatively colder months and in July (about 14%) among the warmer months (data not shown).  
15  
16  
17  
18  
19  
20  
21  
22  
23  
24  
25  
26  
27  
28  
29  
30  
31  
32

### 33 **Case-crossover analysis**

34  
35 Figure 2 shows the estimated odds ratio (OR) (95% CI) for the association of SIDS events  
36 with each of the pollutants considered based on the conditional Poisson model. For an  
37 interquartile range increase in previous day pollutant concentration, the percentage increase  
38 (95% confidence interval) for the risk of SIDS death was 16 (6, 27);  $p = 0.002$  for PM<sub>10</sub>, 1 (-7,  
39 10);  $p = 0.83$  for SO<sub>2</sub>, 5 (-4, 14);  $p = 0.33$  for CO, -17 (-27, -6) ;  $p = 0.004$  for O<sub>3</sub>, 16 (2, 31);  $p =$   
40 0.02 for NO<sub>2</sub>, 2 (-3, 8);  $p = 0.47$  for NO and 8 (-1, 18);  $p = 0.07$  for NO<sub>x</sub> after controlling for  
41 average temperature and national holidays. Therefore, considering pollutant levels at lag 1,  
42 significant association with increased risk of SIDS was indicated only for PM<sub>10</sub> and NO<sub>2</sub> while a  
43 protective effect was apparent for O<sub>3</sub>.  
44  
45  
46  
47  
48  
49  
50  
51  
52  
53  
54  
55  
56  
57  
58  
59  
60

## Sensitivity analyses

Lag structures: Analyses exploring relationships between SIDS and air pollution for other lag structures (lags 0, 2, 3, ..., 6 and corresponding average of lags 0-1, 0-2, 0-3, ..., 0-6) indicated associations were somewhat sensitive to the choice of lag (Figure 3). In the single lag models, there was an impression of stronger delayed effects for CO, NO<sub>2</sub>, O<sub>3</sub>, PM<sub>10</sub> and SO<sub>2</sub> compared to relatively recent lags (lag 0 and lag 1). The effect of NO appeared to remain comparatively flat across lags. Relatively more consistent association across lags was observed for NO<sub>2</sub> and PM<sub>10</sub> and to some extent for CO. Likewise, in average lag models, ORs tended to increase with averaging over more lags with exception of NO where such an effect was not observed. Results were also similar (at least qualitatively) after adjusting for minimum temperature instead of the average temperature (see Supplementary File: Figure S3).

Multi-pollutant models: Further investigation using two-pollutant models also showed associations were sensitive to control of other pollutants. In general, adjusting for co-pollutants appeared to attenuate ORs towards the null except for NO<sub>2</sub> and PM<sub>10</sub> where effects remained to persist (Figure 4). Interestingly, after controlling for PM<sub>10</sub>, the protective effect of O<sub>3</sub> and the adverse effect of NO<sub>2</sub> observed in the single pollutant models were not apparent for most of the lag choices. Similarly, none of the other pollutants showed marked association with SIDS after controlling for PM<sub>10</sub> effects. The estimates from the multi-pollutant model should, however, be interpreted with caution as most of the pollutants were correlated.

## COMMENTS

### Summary of findings

In this study we hypothesised a delayed effect (lag 1) of air pollution on SIDS incidence and investigated additional lags in sensitivity analyses and in single and multi-pollutant models. Though confidence intervals were wide, we found evidence suggesting association of SIDS mortality with PM<sub>10</sub> and NO<sub>2</sub> exposure. Compared to other pollutants, their effects persisted after controlling for co-pollutants and across the various lag structures investigated. The exception was controlling for O<sub>3</sub> did attenuate the risk estimates observed for both PM<sub>10</sub> and NO<sub>2</sub>. There were no consistent associations observed with exposure to the remaining pollutants investigated (CO, SO<sub>2</sub>, NO, NO<sub>x</sub>). An exception was the protective effect observed in relation to O<sub>3</sub> exposure.

### Strengths and limitations

Previous studies have tended to focus on relatively longer-term exposure to air pollutants.[37,39,40] Our study is one of the first to use case-crossover methodology to explore the impact of air pollution on SIDS based on data from UK. Using an approach that is suitable for estimating the risk of a rare acute outcome such as SIDS events, we were able to investigate various lags and multi-pollutant models indicating delayed effects of pollutants that persisted after controlling for co-pollutants. However, measurement error for air pollution exposure a potential limitation in this study as we did not use personal measurements. Other epidemiological studies using data from ambient monitoring stations have shown a good level of correlation between daily personal exposure and daily ambient air pollution measurements,[36, 37] though

1  
2  
3 there is the potential for measurement error that can attenuate regression coefficient estimates.  
4  
5 That is, such misclassification will likely lead to an under estimation of the effects. We were also  
6  
7 unable to control for influenza and humidity as we did not have access to reliable data for these  
8  
9 variables.  
10  
11  
12  
13

### 14 **Detailed discussion**

15  
16  
17 Certain groups of the population are more vulnerable to ambient air pollution than others  
18  
19 and children figure predominantly amongst them due to the fragility of their immune system and  
20  
21 the ratio of their lung capacity to their size. [41] Particulate matter has been recognised as the  
22  
23 most significant contributor to air quality related morbidity and mortality [42] and a number of  
24  
25 studies have reported a link between infant mortality and PM<sub>10</sub> at similar concentrations of  
26  
27 pollutant below air quality guidelines as are described in this study.[11,43,44] However previous  
28  
29 evidence of a direct association with SIDS is inconclusive and few studies describe a significant  
30  
31 association of PM<sub>10</sub> with increased risk. [6, 45]  
32  
33  
34

35  
36 The potential association with NO<sub>2</sub> we discovered reflected the findings of a multi-city  
37  
38 study from Canada that found an increased risk for SIDS with a lag of two-days.[8] More  
39  
40 broadly our findings are in line with previous studies that have found evidence of a lag between  
41  
42 exposure to criteria pollutants and mortality. For PM<sub>10</sub>, a single days exposure has been shown to  
43  
44 have an effect for up to 5 days [46, 47] and numbers of respiratory deaths appear to be more  
45  
46 affected by air pollution levels on previous days, than cardiovascular deaths that are impacted by  
47  
48 same-day pollution.[48] For example myocardial infarction represents an acute response to a  
49  
50 trigger.[49]  
51  
52  
53  
54  
55  
56  
57  
58  
59  
60

1  
2  
3 This is biologically plausible when considering how a wider and more lagged response can  
4 be expected for deaths from respiratory responses to pollution (eg, COPD) via the proposed  
5 mechanisms, such as pulmonary or systemic inflammation and modulated immunity.[50]

6  
7  
8 With regards the apparent protective properties of O<sub>3</sub> that we describe here it's worth noting that  
9 these have been seen previously.[39] One possible reason for the negative association of O<sub>3</sub> and  
10 SIDS might be its negative correlation with other pollutants, in particular that with fine  
11 particulate matter pollution.[51] O<sub>3</sub> also showed a positive correlation with temperature while all  
12 other pollutants were negatively correlated.  
13  
14  
15  
16  
17  
18  
19  
20  
21  
22  
23

24 Concern around the effects of air pollution continue to mount particularly within developing  
25 economies [52] where it contributes to 3.3 million premature deaths worldwide per year a figure  
26 estimated to double by 2050 if the issue remains unattended.[53] However it appears that  
27 recently fossil fuel emissions have begun to increase again due to the developing world's  
28 reliance on them to power their expanding economies.[54] In the developed West, policy  
29 initiatives are beginning to recognise the mounting issue posed by the adverse effects on health  
30 posed by ambient air pollution. However shifting political priorities in the United States has seen  
31 a commitment to revitalise the coal industry [55] and an increase in the production of shale oil  
32 [56] However mitigating these risks is not a straightforward proposition and government policies  
33 appear slow to react, for example in the UK pledges to cease sales of diesel and petrol cars do  
34 not come into effect until 2040.[57]  
35  
36  
37  
38  
39  
40  
41  
42  
43  
44  
45  
46  
47  
48

49 In the absence of coherent policy to address the issue a number of proposals have been put  
50 forward to mitigate the effects of high levels of ambient exposure. Knowing that children and  
51 young adults may be highly susceptible to some of the subclinical changes caused by air  
52  
53  
54  
55  
56  
57  
58  
59  
60

1  
2  
3 pollution [58,59] and as indoor concentrations are lower than ambient levels advice has been to  
4 remain indoors to reduce exposure and acute health risks on high air pollution days.[60] There  
5 are also systems available for cleaning indoor air though these may be deemed expensive for the  
6 economically deprived.[61] There has also been a case made for chemo-preventive interventions,  
7 such as antioxidant or antithrombotic agents, but without data on health outcomes, no  
8 recommendations can be made in their use for primary prevention. [62]  
9  
10  
11  
12  
13  
14  
15  
16  
17  
18

## 19 **Conclusions**

20  
21 Understanding the effects of air pollution on child health is more relevant than ever. Our work  
22 here has highlighted a potential association of Sudden Infant Death with PM<sub>10</sub> and NO<sub>2</sub> and the  
23 association with particulate matter and infant mortality in particular is widely recognised.  
24 However, until policy reflects the growing evidence and responds to mounting public concern, it  
25 would appear to be the responsibility of individuals to take independent action to mitigate the  
26 effects of air pollution and protect the health of their young ones.  
27  
28  
29  
30  
31  
32  
33  
34  
35  
36  
37  
38  
39  
40  
41  
42  
43  
44  
45  
46  
47  
48  
49  
50  
51  
52  
53  
54  
55  
56  
57  
58  
59  
60

## ACKNOWLEDGMENTS

**Funding:** This work was supported by The Lullaby Trust, grant number 260.

**Competing interests:** All authors declare: grants from The Lullaby Trust; no financial relationships with any organisations that might have an interest in the submitted work in the previous three years and no other relationships or activities that could appear to have influenced the submitted work.

**Author contributions statement:** IJL contributed to the conceptualisation of the study, initial draft manuscript and supervised the research project at all stages. NIM contributed to the research design, performed the data management, analysis and interpretation, and with IJL drafted the initial manuscript; JGA contributed to the conceptualisation of the study, data interpretation and critically reviewed the manuscript; JJKJ contributed to the conceptualisation of the study, data interpretation and critically reviewed the manuscript; All authors approved the final manuscript as submitted.

**Transparency:** As lead author, I can confirm that the manuscript is an honest, accurate, and transparent account of the study being reported. No important aspects have been omitted and there are no discrepancies from the planned study.

**Ethics committee approval:** Ethical approval was given by the University of Birmingham, Life and Health Sciences Ethical Review Committee.

**Data sharing:** No additional data available.

## REFERENCES

1. Royal College of Physicians, Royal College of Paediatrics and Child Health. Every breath we take: The lifelong impact of air pollution. 2016.  
<https://www.rcplondon.ac.uk/projects/outputs/every-breath-we-take-lifelong-impact-air-pollution> (accessed Apr 2017).
2. World Health Organization. Burden of disease from Ambient Air Pollution for 2012. 2014.  
[http://www.who.int/phe/health\\_topics/outdoorair/databases/AAP\\_BoD\\_results\\_March2014.pdf?ua=1](http://www.who.int/phe/health_topics/outdoorair/databases/AAP_BoD_results_March2014.pdf?ua=1) (accessed Apr 2017).
3. Brauer M, Lencar C, Tamburic L, et al. A cohort study of traffic-related air pollution impacts on birth outcomes. *Environ Health Perspect* 2008;116(5):680-6.
4. Fleischer NL, Merialdi M, van Donkelaar A, et al. Outdoor air pollution, preterm birth, and low birth weight: analysis of the World Health Organization global survey on maternal and perinatal health. *Environ Health Perspect* 2014;122(4):425-30.
5. Knobel HH, Chen CJ, Liang KY. Sudden infant death syndrome in relation to weather and optometrically measured air pollution in Taiwan. *Pediatrics* 1995;96(6):1106-10.
6. Lipfert FW, Zhang J, Wyzga RE. Infant mortality and air pollution: a comprehensive analysis of U.S. data for 1990. *J Air Waste Manag Assoc* 2000;50(8):1350-66.
7. Hunt CE. Sudden infant death syndrome and other causes of infant mortality: diagnosis, mechanisms, and risk for recurrence in siblings. *Am J Respir Crit Care Med* 2001;164(3):346-57.
8. Dales R, Burnett RT, Smith-Doiron M, et al. Air pollution and sudden infant death syndrome. *Pediatrics* 2004;113(6):e628-31.



- 1  
2  
3 9. Kaiser R, Romieu I, Medina S, et al. Air pollution attributable postneonatal infant mortality  
4  
5 in U.S. metropolitan areas: a risk assessment study. *Environ Health* 2004;3(1):4.  
6
- 7  
8 10. Heinrich J, Slama R. Fine particles, a major threat to children. *Int J Hyg Environ Health*  
9  
10 2007;210(5):617-22.  
11
- 12 11. Yorifuji T, Kashima S, [Doi H](#). Acute exposure to fine and coarse particulate matter and  
13  
14 infant mortality in Tokyo, Japan (2002-2013). [Sci Total Environ](#). 2016 May 1;551-552:66-  
15  
16 72. doi:10.1016/j.scitotenv.2016.01.211. Epub 2016 Feb 11.  
17  
18
- 19 12. Luechinger S [Air pollution and infant mortality: A natural experiment from power plant](#)  
20  
21 [desulfurization](#) *Journal of Health Economics* 37 (2014) 219–231  
22
- 23 13. National Institute of Child Health and Human Development. How many infants die from  
24  
25 SIDS or are at risk for SIDS? 2013.  
26  
27 <https://www.nichd.nih.gov/health/topics/sids/conditioninfo/pages/risk.aspx> (accessed Apr  
28  
29 2017).  
30  
31
- 32 14. Kinney HC, Thach BT. The sudden infant death syndrome. *N Engl J Med*  
33  
34 2009;361(8):795-805.  
35  
36
- 37 15. Goldwater PN Infection: the neglected paradigm in SIDS research *Archives of Disease in*  
38  
39 *Childhood* 2017;102:767-772.  
40  
41
- 42 16. Leach CE, Blair PS, Fleming PJ, et al. Epidemiology of SIDS and explained sudden infant  
43  
44 deaths. CESDI SUDI Research Group. *Pediatrics* 1999;104(4):e43.  
45  
46
- 47 17. Brooke H, Gibson A, Tappin D, et al. Case-control study of sudden infant death syndrome  
48  
49 in Scotland, 1992-5. *BMJ* 1997;314(7093):1516-20.  
50  
51
- 52 18. Douglas AS, Allan TM, Helms PJ. Seasonality and the Sudden Infant Death Syndrome  
53  
54 during 1987-9 and 1991-3 in Australia and Britain. *BMJ* 1996;312(7043):1381-3.  
55  
56  
57  
58  
59

19. Glinianaia SV, Rankin J, Bell R, et al. Does particulate air pollution contribute to infant death? A systematic review. *Environ Health Perspect* 2004;112(14):1365-70.
20. Tong S, Colditz P. Air pollution and sudden infant death syndrome: a literature review. *Paediatr Perinat Epidemiol* 2004;18(5):327-35.
21. "2014 UK Population Estimates". ONS. Retrieved 27 July 2015
22. National Centre for Atmospheric Science, Natural Environment Research Council. British Atmospheric Data Centre. [http://badc.nerc.ac.uk/home/index\\_beacon.html](http://badc.nerc.ac.uk/home/index_beacon.html) (accessed Apr 2017).
23. Pope A. "Indices of Deprivation England and Wales 2010" [ESRI Shapefile geospatial data]. 2013. <https://www.sharegeo.ac.uk/handle/10672/481> (accessed Dec 2016).
24. Maclure M. The case-crossover design: a method for studying transient effects on the risk of acute events. *Am J Epidemiol* 1991;133(2):144-53.
25. Lee JT, Schwartz J. Reanalysis of the effects of air pollution on daily mortality in Seoul, Korea: A case-crossover design. *Environ Health Perspect* 1999;107(8):633-6.
26. Jaakkola JJ. Case-crossover design in air pollution epidemiology. *Eur Respir J Suppl* 2003;40:81s-5s.
27. Pope CA 3rd, Muhlestein JB, May HT, et al. Ischemic heart disease events triggered by short-term exposure to fine particulate air pollution. *Circulation* 2006;114(23):2443-8.
28. Bhaskaran K, Hajat S, Armstrong B, et al. The effects of hourly differences in air pollution on the risk of myocardial infarction: case crossover analysis of the MINAP database. *BMJ* 2011;343:d5531.
29. Janes H, Sheppard L, Lumley T. Case-crossover analyses of air pollution exposure data: referent selection strategies and their implications for bias. *Epidemiology* 2005;16:717-26

- 1
- 2
- 3 30. Breslow NE, Day NE. Statistical methods in cancer research. Volume I - The analysis of
- 4 case-control studies. IARC Sci Publ 1980;32:5-338.
- 5
- 6
- 7 31. Armstrong BG, Gasparrini A, Tobias A. Conditional Poisson models: a flexible alternative
- 8 to conditional logistic case cross-over analysis. BMC Med Res Methodol 2014;14:122.
- 9
- 10 32. Le Tertre A, Medina S, Samoli E, et al. Short-term effects of particulate air pollution on
- 11 cardiovascular diseases in eight European cities. J Epidemiol Community Health
- 12 2002;56(10):773-9.
- 13
- 14 33. Katsouyanni K, Samet JM, Anderson HR, et al. Air pollution and health: a European and
- 15 North American approach (APHENA). Res Rep Health Eff Inst 2009;142:5-90.
- 16
- 17 34. Scheers H, Mwalili SM, Faes C, et al. Does air pollution trigger infant mortality in Western
- 18 Europe? A case-crossover study. Environ Health Perspect 2011;119(7):1017-22.
- 19
- 20 35. Braga AL, Zanobetti A, Schwartz J. The effect of weather on respiratory and
- 21 cardiovascular deaths in 12 U.S. cities. Environ Health Perspect 2002;110(9):859-63.
- 22
- 23 36. Armstrong B. Models for the relationship between ambient temperature and daily
- 24 mortality. Epidemiology 2006;17(6):624-31.
- 25
- 26 37. R Core Team. R: A Language and Environment for Statistical Computing. 2013.
- 27 <http://www.R-project.org> (accessed Apr 2017).
- 28
- 29 38. <https://uk-air.defra.gov.uk/air-pollution/uk-eu-limits> (accessed Dec 2017).
- 30
- 31 39. Ritz B, Wilhelm M, Zhao Y. Air pollution and infant death in southern California, 1989-
- 32 2000. Pediatrics 2006;118(2):493-502.
- 33
- 34 40. Woodruff TJ, Darrow LA, Parker JD. Air pollution and postneonatal infant mortality in the
- 35 United States, 1999-2002. Environ Health Perspect 2008;116(1):110-5.
- 36
- 37 41. Pope CA, Dockery DW Health Effects of Fine Particulate Air Pollution: Lines that
- 38 Connect Journal of the Air & Waste Management Association\_2006; 56 (6)
- 39
- 40
- 41
- 42
- 43
- 44
- 45
- 46
- 47
- 48
- 49
- 50
- 51
- 52
- 53
- 54
- 55
- 56
- 57
- 58
- 59
- 60

- 1  
2  
3  
4  
5 42. Lancet commission on air quality and health Published online October 19, 2017  
6  
7 [http://dx.doi.org/10.1016/S0140-6736\(17\)32345-0](http://dx.doi.org/10.1016/S0140-6736(17)32345-0) (Accessed November 2017)  
8  
9  
10 43. Rice MB, Ljungman PL, Wilker EH, et al. Short-term exposure to air pollution and lung  
11 function in the Framingham Heart Study. *Am J Respir Crit Care Med* 2013; 188 (11):  
12 1351- 357.  
13  
14  
15 44. Samoli E, Stafoggia M, Rodopoulou S, et al. Associations between fine and coarse  
16 particles and mortality in Mediterranean cities: results from the MED-PARTICLES  
17 project. *Environ Health Perspect* 2013; 121 (8):932–938  
18  
19  
20 45. Woodruff TJ, Parker JD, Schoendorf KC. Fine Particulate Matter (PM(2.5)) Air Pollution  
21 and Selected Causes of Postneonatal Infant Mortality in California. *Environ Health*  
22 *Perspect* 2006;114(5):786-90.  
23  
24  
25 46. Schwartz J The distributed lag between air pollution and daily deaths *Epidemiology*. 2000  
26 May;11(3):320-6  
27  
28  
29 47. Association Between Short-Term Exposure to PM2.5 and PM10 and Mortality in  
30 Susceptible Subgroups: A Multisite Case-Crossover Analysis of Individual Effect  
31 Modifiers Rita E Massimo A, Annunziata S, Giovanna F, Canova BC, De Togni A, Di  
32 Biagio K, Gherardi B, Giannini S, Lauriola P *American Journal of Epidemiology*, Volume  
33 184, Issue 10, 15 November 2016, Pages 744–754  
34  
35  
36 48. Braga AL, Zanobetti A, Schwartz J. The lag structure between particulate air pollution and  
37 respiratory and cardiovascular deaths in 10 US cities. *J Occup Environ Med*. 2001  
38 Nov;43(11):927-33  
39  
40  
41 49. Gold DR, Litonjua A, Schwartz J, et al. Ambient pollution and heart rate variability.  
42 *Circulation*. 2000; 101: 1267–1273  
43  
44  
45  
46  
47  
48  
49  
50  
51  
52  
53  
54  
55  
56  
57  
58  
59  
60

- 1
- 2
- 3 50. Blackwell C, Moscovis S, Hall S, et al. Exploring the risk factors for sudden infant deaths
- 4 and their role in inflammatory responses to infection. *Front Immunol.* 2015;6:44.
- 5
- 6
- 7
- 8 51. Sarnat J, Schwartz J, Suh H. Comment on: Fine particulate air pollution and mortality in 20
- 9 U.S. cities. *N Engl J Med* 2001;344(16):1253-4
- 10
- 11
- 12 52. WHO (2014) “Burden of Disease from Ambient Air Pollution for 2012.” n.d.
- 13
- 14 [15 \(http://www.who.int/phe/health\\_topics/outdoorair/databases/AAP\\_BoD\\_results\\_March20](http://www.who.int/phe/health_topics/outdoorair/databases/AAP_BoD_results_March20)
- 16 [17 14.pdf\)](http://www.who.int/phe/health_topics/outdoorair/databases/AAP_BoD_results_March20)
- 18
- 19 53. Lelieveld, J., J. S. Evans, M. Fnais, D. Giannadaki, and A. Pozzer. 2015. “The
- 20 Contribution of Outdoor Air Pollution Sources to Premature Mortality on a Global Scale.”
- 21
- 22 *Nature* 525 (7569). [nature.com](http://www.nature.com): 367–71
- 23
- 24
- 25
- 26 54. Jackson R, Le Quere C, Andrew RM, Canadell JG, Peters GP, Roy J, Wu L *Environ. Res.*
- 27 *Lett.* 12 (2017) 110202
- 28
- 29
- 30
- 31 55. [32 http://www.independent.co.uk/news/world/americas/donald-trump-coal-mining-jobs-](http://www.independent.co.uk/news/world/americas/donald-trump-coal-mining-jobs-)
- 33 [34 promise-experts-disagree-executive-order-a7656486.html](http://www.independent.co.uk/news/world/americas/donald-trump-coal-mining-jobs-) (accessed November 2017)
- 35
- 36 56. [37 https://www.eia.gov/tools/faqs/faq.php?id=847&t=6](https://www.eia.gov/tools/faqs/faq.php?id=847&t=6) (accessed November 2017)
- 38
- 39 57. [40 https://www.theguardian.com/politics/2017/jul/25/britain-to-ban-sale-of-all-diesel-and-](https://www.theguardian.com/politics/2017/jul/25/britain-to-ban-sale-of-all-diesel-and-)
- 41 [42 petrol-cars-and-vans-from-2040](https://www.theguardian.com/politics/2017/jul/25/britain-to-ban-sale-of-all-diesel-and-) (accessed November 2017)
- 43
- 44 58. Rich DQ, Kipen HM, Huang W, et al. Association between changes in air pollution levels
- 45 during the Beijing Olympics and biomarkers of inflammation and thrombosis in healthy
- 46 young adults. *JAMA* 2012;307:2068-78
- 47
- 48
- 49 59. Wright RJ, Brunst KJ. Programming of respiratory health in childhood: influence of
- 50 outdoor air pollution. *Curr Opin Pediatr* 2013;25:232-9.
- 51
- 52
- 53 60. Plaia A, Ruggieri M: Air quality indices: a review. *Rev Environ Sci Bio* 2011;10:165-79
- 54
- 55
- 56
- 57
- 58
- 59
- 60

- 1  
2  
3 61. David L. MacIntosh , Theodore A. Myatt , Jerry F. Ludwig , Brian J. Baker , Helen H. Suh  
4 & John D. Spengler (2008) Whole House Particle Removal and Clean Air Delivery Rates  
5 for In-Duct and Portable Ventilation Systems, Journal of the Air & Waste Management  
6 Association, 58:11, 1474-1482  
7  
8  
9  
10  
11  
12 62. Laumbach R, Meng Q, Kipen H. What can individuals do to reduce personal health risks  
13 from air pollution? J Thorac Dis 2015;7(1):96-107. doi: 10.3978/j.issn.2072-  
14 1439.2014.12.2  
15  
16  
17  
18  
19  
20  
21  
22  
23  
24  
25

## 26 **FIGURE LEGENDS**

27  
28  
29  
30 **Fig. 1** Air pollution monitoring sites with road networks (motorways and A-roads) and SIDS events in the  
31 study area. We used ArcGIS Desktop 10.2 (<http://www.esri.com/software/arcgis>) to create the map  
32 combining shapefiles for postcode areas and motorways and overlaying air pollution and SIDS data.  
33  
34  
35  
36  
37  
38

39 **Fig. 2** Estimated risk of SIDS for an IQR increase in lag 1 pollutant concentration before and after  
40 controlling for confounding by average temperature and national holidays  
41  
42  
43  
44

45 **Fig. 3** Risk of SIDS associated with an IQR increase in pollution for selected lags and average of lags;  
46 models adjusted for average temperature and national holidays  
47  
48  
49  
50

51 **Fig. 4** Risk of SIDS associated with an IQR increase in air pollution after controlling for co-pollutants,  
52 average temperature and national holidays(panel titles indicate: main and co-pollutant respectively)  
53  
54  
55  
56  
57  
58  
59  
60

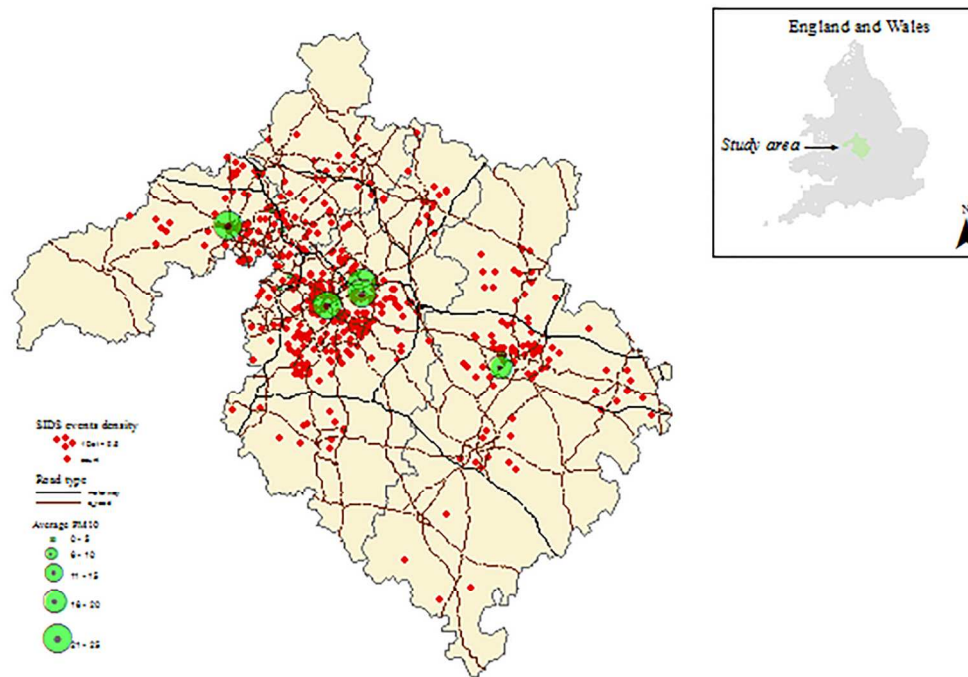

Fig. 1 Air pollution monitoring sites with road networks (motorways and A-roads) and SIDS events in the study area. We used ArcGIS Desktop 10.2 (<http://www.esri.com/software/arcgis>) to create the map combining shapefiles for postcode areas and motorways and overlaying air pollution and SIDS data.

152x105mm (300 x 300 DPI)



Fig. 2 Estimated risk of SIDS for an IQR increase in lag 1 pollutant concentration before and after controlling for confounding by average temperature and national holidays

179x143mm (300 x 300 DPI)



1  
2  
3  
4  
5  
6  
7  
8  
9  
10  
11  
12  
13  
14  
15  
16  
17  
18  
19  
20  
21  
22  
23  
24  
25  
26  
27  
28  
29  
30  
31  
32  
33  
34  
35  
36  
37  
38  
39  
40  
41  
42  
43  
44  
45  
46  
47  
48  
49  
50  
51  
52  
53  
54  
55  
56  
57  
58  
59  
60

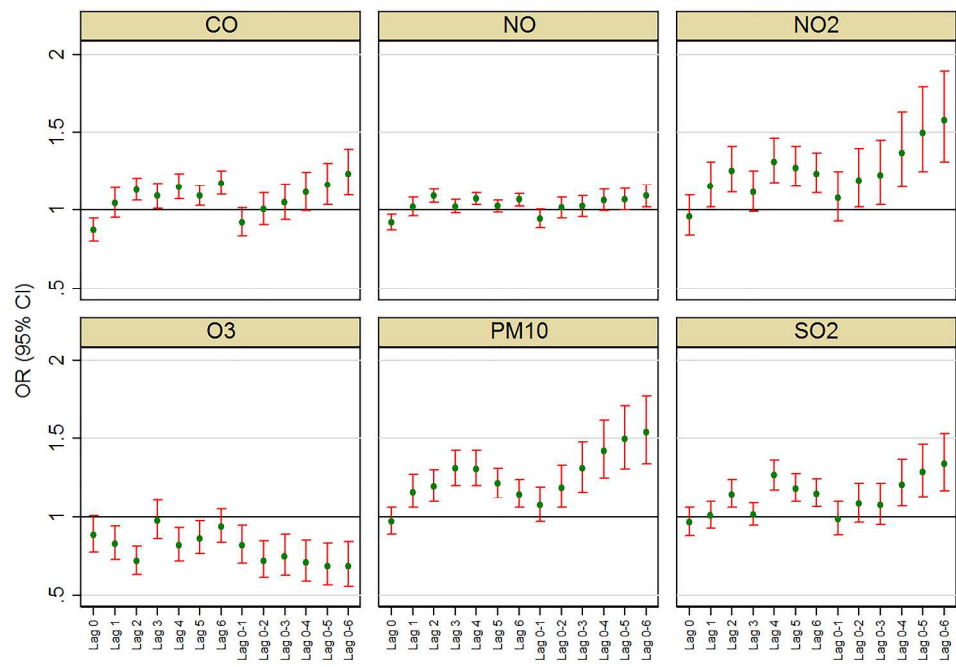

Fig. 3 Risk of SIDS associated with an IQR increase in pollution for selected lags and average of lags; models adjusted for average temperature and national holidays

475x346mm (300 x 300 DPI)



Fig. 4 Risk of SIDS associated with an IQR increase in air pollution after controlling for co-pollutants, average temperature and national holidays(panel titles indicate: main and co-pollutant respectively)

475x346mm (300 x 300 DPI)

### Conditional Poisson Regression (CPR)

Here we applied the time stratified case-crossover approach where the strata are matching days based on the same day of the week, calendar month and year that has previously been used to minimise bias [Janes et al. 2005]. That is, control days were selected from the same day of the week, within the same calendar month and year as the event day. We applied a conditional Poisson regression model which has been shown to give equivalent estimates as the conditional logistic model but with the advantage of readily allowing for overdispersion.

Thus, to fit the CPR model we first create the strata for yearXmonthXday-of-week from the original time series data and then fit the regression using the 'gmn' package adjusting for temperature spline and holiday effects, conditional on strata as detailed in Armstrong et al. [2014]. An example line of R code to fit the CPR model using the R package 'gmn' is given below: `CPR_model <- gmn(sids_freq ~ Lag(pollution, k) + ns(temperature,3) + holiday, data=data, family=quasipoisson, eliminate=factor(stratum))`

where

Lag(pollution, k): pollution exposure at lag k

ns(temperature,3): temperature splines

sids\_freq: SIDS count

stratum: stratum indicator (for yearXmonthXday-of-week)

### References

Holly Janes, Lianne Sheppard, Thomas Lumley. Case-Crossover Analyses of Air Pollution Exposure Data, Referent Selection Strategies and Their Implications for Bias. *Epidemiology* 2005;16: 717-726.

Armstrong BG, Gasparini A, Tobias A. Conditional Poisson models: a flexible alternative to conditional logistic case cross-over analysis. *BMC Med Res Methodol* 2014;14:122.

1  
2  
3  
4  
5  
6  
7  
8  
9  
10  
11  
12  
13  
14  
15  
16  
17  
18  
19  
20  
21  
22  
23  
24  
25  
26  
27  
28  
29  
30  
31  
32  
33  
34  
35  
36  
37  
38  
39  
40  
41  
42  
43  
44  
45  
46  
47  
48  
49  
50  
51  
52  
53  
54  
55  
56  
57  
58  
59  
60

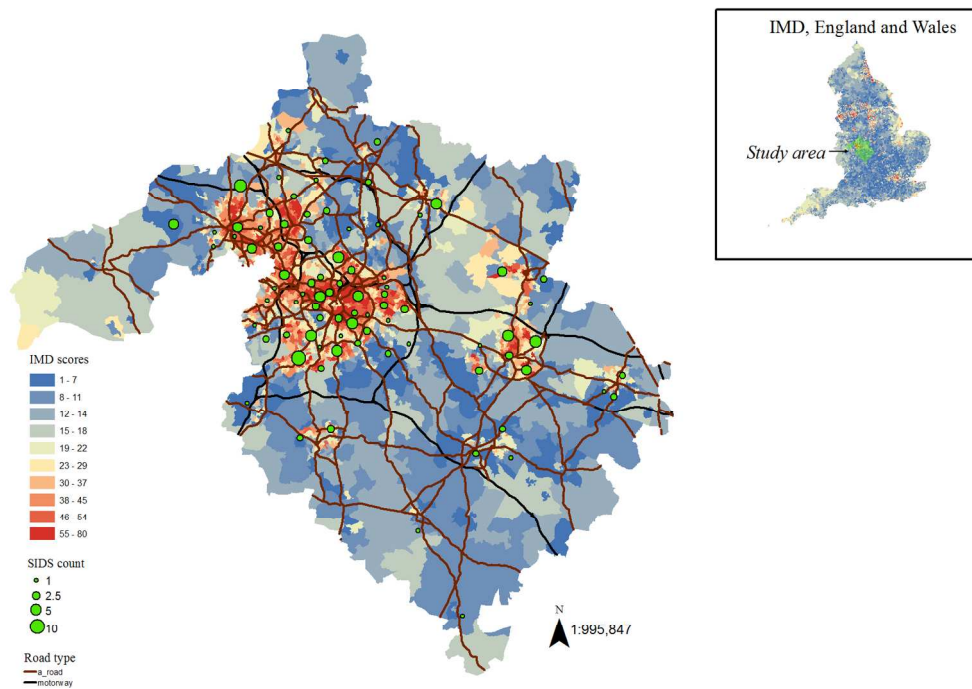

152x114mm (300 x 300 DPI)

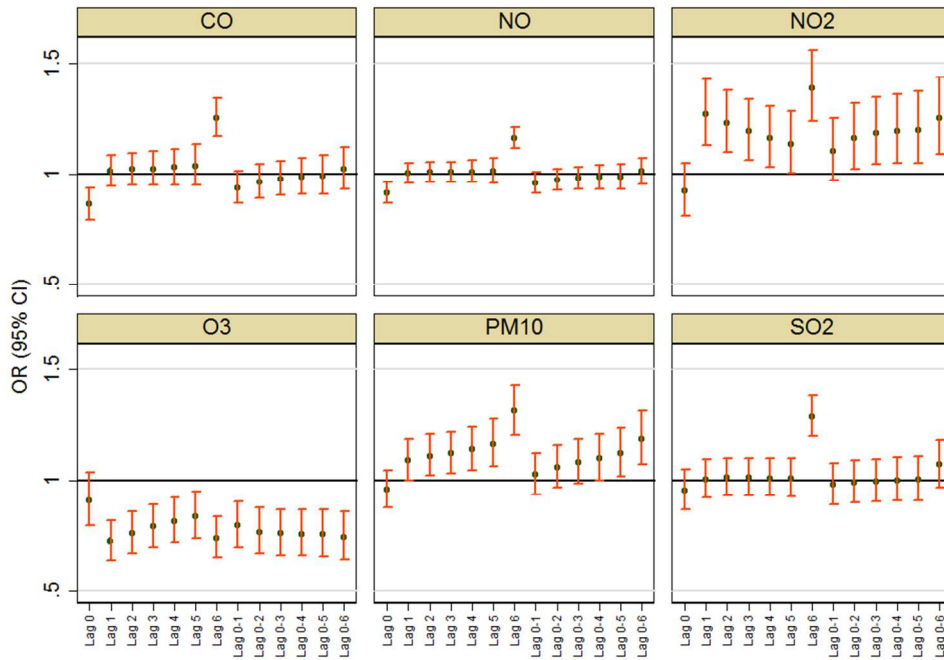

352x256mm (72 x 72 DPI)

Preprint only

STROBE Statement—Checklist of items that should be included in reports of *case-control studies*

|                              | Item No | Recommendation                                                                                                                                                                       | Response                                                                                              |
|------------------------------|---------|--------------------------------------------------------------------------------------------------------------------------------------------------------------------------------------|-------------------------------------------------------------------------------------------------------|
| <b>Title and abstract</b>    | 1       | (a) Indicate the study's design with a commonly used term in the title or the abstract                                                                                               | Case-crossover study included in title – Title page                                                   |
|                              |         | (b) Provide in the abstract an informative and balanced summary of what was done and what was found                                                                                  | Completed – including toning down the conclusion as per the associate editor's instruction page 2     |
| <b>Introduction</b>          |         |                                                                                                                                                                                      |                                                                                                       |
| Background/rationale         | 2       | Explain the scientific background and rationale for the investigation being reported                                                                                                 | Page 3                                                                                                |
| Objectives                   | 3       | State specific objectives, including any prespecified hypotheses                                                                                                                     | Page 3                                                                                                |
| <b>Methods</b>               |         |                                                                                                                                                                                      |                                                                                                       |
| Study design                 | 4       | Present key elements of study design early in the paper                                                                                                                              | Page 4                                                                                                |
| Setting                      | 5       | Describe the setting, locations, and relevant dates, including periods of recruitment, exposure, follow-up, and data collection                                                      | Page 4                                                                                                |
| Participants                 | 6       | (a) Give the eligibility criteria, and the sources and methods of case ascertainment and control selection. Give the rationale for the choice of cases and controls                  | The study is a case-crossover study where effectively individuals act as their own controls<br>Page 4 |
|                              |         | (b) For matched studies, give matching criteria and the number of controls per case                                                                                                  | N/A                                                                                                   |
| Variables                    | 7       | Clearly define all outcomes, exposures, predictors, potential confounders, and effect modifiers. Give diagnostic criteria, if applicable                                             | Page 5                                                                                                |
| Data sources/<br>measurement | 8*      | For each variable of interest, give sources of data and details of methods of assessment (measurement). Describe comparability of assessment methods if there is more than one group | Page 4-6                                                                                              |
| Bias                         | 9       | Describe any efforts to address potential sources of bias                                                                                                                            | Pages 4-6                                                                                             |
| Study size                   | 10      | Explain how the study size was arrived at                                                                                                                                            | Page 4                                                                                                |
| Quantitative<br>variables    | 11      | Explain how quantitative variables were handled in the analyses. If applicable, describe which groupings were chosen and why                                                         | Page 6                                                                                                |
| Statistical methods          | 12      | (a) Describe all statistical methods, including those used to control for confounding                                                                                                | Page 4-6                                                                                              |

1  
2  
3  
4  
5  
6  
7  
8  
9  
10  
11  
12  
13  
14  
15  
16  
17  
18  
19  
20  
21  
22  
23  
24  
25  
26  
27  
28  
29  
30  
31  
32  
33  
34  
35  
36  
37  
38  
39  
40  
41  
42  
43  
44  
45  
46  
47

|                                                                             |                            |
|-----------------------------------------------------------------------------|----------------------------|
| (b) Describe any methods used to examine subgroups and interactions         | Page 6                     |
| (c) Explain how missing data were addressed                                 | Page 4                     |
| (d) If applicable, explain how matching of cases and controls was addressed | N/A (Case-crossover study) |
| (e) Describe any sensitivity analyses                                       | Page 7                     |

**Results**

|                  |     |                                                                                                                                                                                                              |           |
|------------------|-----|--------------------------------------------------------------------------------------------------------------------------------------------------------------------------------------------------------------|-----------|
| Participants     | 13* | (a) Report numbers of individuals at each stage of study—eg numbers potentially eligible, examined for eligibility, confirmed eligible, included in the study, completing follow-up, and analysed            | Page 8    |
|                  |     | (b) Give reasons for non-participation at each stage                                                                                                                                                         | Page 8    |
|                  |     | (c) Consider use of a flow diagram                                                                                                                                                                           | N/A       |
| Descriptive data | 14* | (a) Give characteristics of study participants (eg demographic, clinical, social) and information on exposures and potential confounders                                                                     | Page 8    |
|                  |     | (b) Indicate number of participants with missing data for each variable of interest                                                                                                                          | N/A       |
| Outcome data     | 15* | Report numbers in each exposure category, or summary measures of exposure                                                                                                                                    | Page 9-10 |
| Main results     | 16  | (a) Give unadjusted estimates and, if applicable, confounder-adjusted estimates and their precision (eg, 95% confidence interval). Make clear which confounders were adjusted for and why they were included | Page 9-10 |
|                  |     | (b) Report category boundaries when continuous variables were categorized                                                                                                                                    | N/A       |
|                  |     | (c) If relevant, consider translating estimates of relative risk into absolute risk for a meaningful time period                                                                                             | N/A       |

|                          |    |                                                                                                                                                                            |            |
|--------------------------|----|----------------------------------------------------------------------------------------------------------------------------------------------------------------------------|------------|
| Other analyses           | 17 | Report other analyses done—eg analyses of subgroups and interactions, and sensitivity analyses                                                                             | Page 11-12 |
| <b>Discussion</b>        |    |                                                                                                                                                                            |            |
| Key results              | 18 | Summarise key results with reference to study objectives                                                                                                                   | Page 13    |
| Limitations              | 19 | Discuss limitations of the study, taking into account sources of potential bias or imprecision. Discuss both direction and magnitude of any potential bias                 | Page 13    |
| Interpretation           | 20 | Give a cautious overall interpretation of results considering objectives, limitations, multiplicity of analyses, results from similar studies, and other relevant evidence | Page 14    |
| Generalisability         | 21 | Discuss the generalisability (external validity) of the study results                                                                                                      | Page 15    |
| <b>Other information</b> |    |                                                                                                                                                                            |            |
| Funding                  | 22 | Give the source of funding and the role of the funders for the present study and, if applicable, for the original study on which the present article is based              | Page 22    |

\*Give information separately for cases and controls.

**Note:** An Explanation and Elaboration article discusses each checklist item and gives methodological background and published examples of transparent reporting. The STROBE checklist is best used in conjunction with this article (freely available on the Web sites of PLoS Medicine at <http://www.plosmedicine.org/>, Annals of Internal Medicine at <http://www.annals.org/>, and Epidemiology at <http://www.epidem.com/>). Information on the STROBE Initiative is available at <http://www.strobe-statement.org>.
